1 **Comparison of fine-scale recombination maps in fungal plant pathogens reveals dynamic**  
2 **recombination landscapes and intragenic hotspots**

3

4

5

6

7 **Authors:**

8 Eva H. Stukenbrock<sup>1+2</sup>) and Julien Y. Dutheil<sup>3+4</sup>)

9

10 <sup>1</sup>) Environmental Genomics, Max Planck Institute for Evolutionary Biology, August-  
11 Thienemann-Str. 2, 24306 Plön, Germany, <sup>2</sup>) Christian-Albrechts University of Kiel,  
12 Environmental Genomics, Am Botanischen Garten 1-11, 24118 Kiel, Germany, <sup>3</sup>) Evolutionary  
13 Genetics, Max Planck Institute for Evolutionary Biology, August-Thienemann-Str. 2, 24306  
14 Plön, Germany and <sup>4</sup>) Institut des Sciences de L'Évolution – Montpellier, CNRS – Université  
15 Montpellier 2, 34095 Montpellier, France

16

17

18

19

20 **Corresponding authors:**

21 Eva H. Stukenbrock and Julien Y. Dutheil

22 Max Planck Institute for Evolutionary Biology

23 August-Thienemann-Str. 2, 24306 Plön, Germany

24 [stukenbrock@evolbio.mpg.de](mailto:stukenbrock@evolbio.mpg.de)

25 [dutheil@evolbio.mpg.de](mailto:dutheil@evolbio.mpg.de)

26

27

28 **Running title:** Recombination rate evolution in fungal plant pathogens

29

30 **Keywords:** genome evolution, recombination analyses, recombination hotspots, fungal plant  
31 pathogens, effectors, *Zymoseptoria*

32

## 33 **Abstract**

34 Meiotic recombination is an important driver of evolution. Variability in the intensity of  
35 recombination across chromosomes can affect sequence composition, nucleotide variation  
36 and rates of adaptation. In many organisms recombination events are concentrated within  
37 short segments termed recombination hotspots. The variation in recombination rate and  
38 recombination hotspot positions can be studied using population genomics data and  
39 statistical methods. In this study, we applied population genomics analyses to address the  
40 evolution of recombination in two closely related fungal plant pathogens: the prominent  
41 wheat pathogen *Zymoseptoria tritici* and a sister species infecting wild grasses *Zymoseptoria*  
42 *ardabiliae*. We specifically addressed whether recombination landscapes, including hotspot  
43 positions, are conserved in the two recently diverged species and if recombination  
44 contributes to rapid evolution of pathogenicity traits. We conducted a detailed simulation  
45 analysis to assess the performance of methods of recombination rate estimation based on  
46 patterns of linkage disequilibrium, in particular in the context of high nucleotide diversity.  
47 Our analyses reveal overall high recombination rates, a lack of suppressed recombination in  
48 centromeres and significantly lower recombination rates on chromosomes that are known to  
49 be accessory. The comparison of the recombination landscapes of the two species reveals a  
50 strong correlation of recombination rate at the megabase scale, but little correlation at  
51 smaller scales. The recombination landscapes in both pathogen species are dominated by  
52 frequent recombination hotspots across the genome including coding regions, suggesting a  
53 strong impact of recombination on gene evolution. A significant but small fraction of these  
54 hotspots co-localize between the two species, suggesting that hotspots dynamics contribute  
55 to the overall pattern of fast evolving recombination in these species.

56

57

58

59

60

61

62

## 63 Introduction

64 | Meiotic recombination is a fundamental process, which in many eukaryotes shapes genetic  
65 variation in populations and drives evolutionary changes. Despite the ubiquitous occurrence  
66 of recombination, however, the mechanisms that determine the genome-wide and temporal  
67 distribution of crossover events are still poorly understood in most species. Studies based on  
68 experimental and empirical data have demonstrated that recombination in sexual organisms  
69 plays a crucial role in defining genome-wide neutral and non-neutral nucleotide variation  
70 patterns (Begun and Aquadro 1992; Spencer et al. 2006), rates of protein evolution  
71 (Betancourt et al. 2009), transposable elements distribution (Rizzon et al. 2002), GC content  
72 (Meunier and Duret 2004), and codon bias (Marais et al. 2003).

73 Accurate genome-wide recombination maps are essential for studying the genomics and  
74 genetics of recombination. Recombination rates have been recorded in many species by  
75 direct observations of meiotic events using genetic crosses or pedigrees (Jeffreys et al. 1998;  
76 Broman et al. 1998; McMullen et al. 2009). However, pedigree studies rely on a large  
77 numbers of individuals and produce only low-resolution rate estimates because of the  
78 relatively low number of meiotic events that can practically be observed (Stumpf and  
79 McVean 2003). Furthermore, many microbial eukaryotic species, including important  
80 pathogens, are difficult or even impossible to cross under laboratory conditions (Taylor et al.  
81 2015). While experimental measures of recombination rate can be challenging in many  
82 species, advances in statistical analyses provide powerful tools to generate fine-scale  
83 recombination maps using population genomic data (e.g., (Myers et al. 2005; Chan et al.  
84 2012; Wang and Rannala 2014)). These methods are based on genome-wide patterns of  
85 linkage disequilibrium among single nucleotide polymorphisms (SNPs) and have the potential  
86 to capture the history of recombination events in a population sample. Thus, recombination  
87 studies based on population genomic data have provided detailed insights into the genomics  
88 of recombination in a range of species (Winckler et al. 2005; Singhal et al. 2015; Hunter et al.  
89 2016; Horton et al. 2012). A general finding from these studies is that recombination events  
90 are non-uniformly distributed across chromosomes. Furthermore, in many organisms, but  
91 not all, the majority of recombination events tend to concentrate in short segments termed  
92 recombination hotspots (Petes 2001; Chan et al. 2012). In the human genome, more than  
93 25,000 recombination hotspots have been identified, with a number of these hotspots  
94 showing a more than hundred-fold increase in recombination rates and exhibiting a strong  
95 impact on the overall recombination landscape and genome evolution in general (Myers et  
96 al. 2005; Jeffreys and Neumann 2009; Winckler et al. 2005).

97 Comparative analyses of recombination maps between closely related species have shed  
98 light on the dynamics of recombination landscapes in different taxa. A comparative analysis  
99 of recombination landscapes in chimpanzee and human found a strong correlation of  
100 recombination rates at broad scales (whole chromosome and megabase scale), whereas fine-  
101 scale recombination rates were considerably less conserved because of non-overlapping  
102 recombination hotspots (Auton et al. 2012). The localization of recombination hotspots in  
103 primates and mice is in large part determined by PRDM9, a histone methyltransferase with  
104 an array of DNA-binding Zn-finger (Myers et al. 2010). In other taxa recombination hotspots  
105 are formed by other mechanisms. In some species, including species without PRDM9,  
106 including yeast, plants, birds and some mammals recombination hotspots associate with  
107 particular functional features such as transcription start and stop sites as well as CpG islands  
108 (Lam and Keeney 2015; Singhal et al. 2015; Smeds et al. 2016; Horton et al. 2012; Choi et al.  
109 2013). A model developed to explain the association of recombination hotspots and  
110 functional elements proposes that a depletion of nucleosome occupancy at these sites  
111 increases the accessibility of the recombination machinery (Kaplan et al. 2009; de Castro et  
112 al. 2011). Indeed, in the fission yeast *Schizosaccharomyces pombe* and the Brassicaceae  
113 plant *Arabidopsis thaliana* meiotic recombination hotspots were shown to co-localize with  
114 nucleosome-depleted regions supporting a link between chromatin structure and  
115 recombination in these species (de Castro et al. 2011; Wijnker et al. 2013).

116

117 Although many pathogens and parasites are sexual, the impact of recombination on the  
118 evolution of their genome has been rarely addressed (Awadalla 2003). As recombination can  
119 be an important driver of overall genome evolution in pathogen species, we here set out to  
120 investigate patterns of recombination in plant pathogenic fungi. We focused on the  
121 important wheat pathogen *Zymoseptoria tritici*, which causes septoria leaf blotch on wheat.  
122 *Z. tritici* originated in the Middle East during the Neolithic revolution and has co-evolved and  
123 dispersed with its host since early wheat domestication (Stukenbrock et al. 2007). A close  
124 relative of *Z. tritici*, *Zymoseptoria ardabiliae*, has been isolated from wild grass species in the  
125 Middle East (Stukenbrock et al. 2012). The two pathogen species diverged recently but have  
126 non-overlapping host ranges and show some differences in morphology and host infection  
127 patterns (Stukenbrock et al. 2011, 2012). Both species undergo frequent sexual  
128 recombination, which result in the formation of ascospores that serve as a mean of long  
129 distance wind dispersal and primary infection of new hosts (Stukenbrock et al. 2011). The co-  
130 linear genomes of *Z. tritici* and *Z. ardabiliae* share 90% nucleotide similarity on average, thus

131 providing an excellent resource for comparative analyses of genome evolution (Stukenbrock  
132 et al. 2011). The 40Mb haploid genome of the reference *Z. tritici* isolate comprises 21  
133 chromosomes of which eight are accessory chromosomes (Goodwin et al. 2011b). The  
134 accessory chromosomes represent a highly variable genome compartment characterized by  
135 presence/absence variation of entire chromosomes, high repeat content and low gene  
136 densities (Goodwin et al. 2011a; Grandaubert et al. 2015). The accessory chromosomes are  
137 partly conserved among several species in the genus *Zymoseptoria*, suggesting that these  
138 small chromosomes have been maintained over long evolutionary times predating the  
139 divergence of species (Stukenbrock et al. 2011). In a previous study, we applied a whole-  
140 genome coalescence approach to generate a genetic map of the ancestral species of *Z. tritici*  
141 and another closely related species, *Z. pseudotritici* (Stukenbrock et al. 2011). We found  
142 evidence of a high recombination rate in the ancestral species (genome average 46cM/Mb)  
143 and showed a significantly higher proportion of sites showing incomplete lineage sorting in  
144 regions with high recombination rate. The existence of high recombination rates in the genus  
145 *Zymoseptoria* was recently supported by experimental data. Croll and colleagues generated a  
146 linkage map of *Z. tritici* from two independent crosses of Swiss field isolates (Croll et al.  
147 2015). This map based on actual crossing-over events along the 40Mb genome, confirms the  
148 high recombination rates (genome average 66 cM/Mb, measured in windows of 20 kb) in the  
149 present-day pathogen species. Interestingly, the study also reported large variation between  
150 the two independent crosses of *Z. tritici*, suggesting that recombination is highly dynamic in  
151 this pathogen (Croll et al. 2015).

152 In this study we addressed the evolution of recombination rate in fungal pathogens. We  
153 applied a population genomics approach to generate a fine-scale recombination map of the  
154 two recently diverged species *Z. tritici* and *Z. ardabiliae*. This allowed us to infer and compare  
155 fine-scale genome-wide patterns of recombination rates in the two species and investigate  
156 the dynamics of recombination landscapes. We confirm the exceptionally high  
157 recombination rates as also observed in a previous coalescence-based genome analysis and  
158 shown by experimental crosses (Stukenbrock et al. 2011; Croll et al. 2015). Furthermore, we  
159 identify 2,578 and 862 recombination hotspots in *Z. tritici* and *Z. ardabiliae* respectively.  
160 Intriguingly, detailed analyses of the recombination hotspots show not only a comparatively  
161 higher hotspot frequency in the wheat pathogen but also the occurrence of stronger  
162 hotspots in *Z. tritici*. Our findings confirm that recombination rate landscapes are highly  
163 dynamic across time in the two fungal pathogens. Furthermore, the prominence of dynamic

164 recombination hotspots in genes suggests a high impact on gene evolution, a finding that is  
165 unprecedented in other species.

166

## 167 **Results and Discussion**

### 168 **Genome alignments and SNP calling**

169 A total of 30 whole genome sequences were used to infer the recombination landscapes of  
170 the two haploid species *Z. tritici* and *Z. ardabiliae*. First, we generated *de novo* genome  
171 assemblies of 10 *Z. tritici* and 13 *Z. ardabiliae* isolates previously not studied (Supplemental  
172 Table S1). The haploid genomes, including additional three *Z. tritici* and four *Z. ardabiliae*  
173 genomes already published (Stukenbrock et al. 2011), were aligned for each species,  
174 resulting in multiple genome alignments of 40.8Mb for *Z. tritici* and 32.4Mb for *Z. ardabiliae*.

175 Recombination analyses rely on single nucleotide polymorphism (SNP) data. However,  
176 erroneously called SNPs or alignment errors can greatly bias linkage disequilibrium (LD)  
177 inference in genomes. To generate high-quality SNP datasets we therefore extensively  
178 filtered the genome alignments (see Materials and Methods) to retain only the alignment  
179 blocks in which all isolates were represented. This filtering yielded genome alignments of  
180 27.7 and 28.2 Mb for *Z. tritici* and *Z. ardabiliae*, respectively (Table 1). We further filter the  
181 alignments to mask ambiguously aligned positions, leading to a final alignment size of 27.3  
182 Mb for *Z. tritici* and 27.7 Mb for *Z. ardabiliae*. Less than 2% of the final alignment contained  
183 repeat elements, including transposable elements. In the case of *Z. tritici*, repeat regions have  
184 been filtered out during the alignment quality checking, while in the case of *Z. ardabiliae* for  
185 which no telomere-to-telomere sequencing is available, repeats were virtually absent from  
186 the original alignment (Table 1). After filtering, we identified 1.48 million SNPs in *Z. tritici* and  
187 1.07 million SNPs in *Z. ardabiliae*, which correspond to nucleotide diversities measured as  
188 Watterson's  $\theta$  of 0.0139 in *Z. tritici* and 0.0087 in *Z. ardabiliae* (Table 1). Thus, despite the  
189 larger sample size, *Z. ardabiliae* shows a much lower SNP density and sequence diversity  
190 than the wheat pathogen *Z. tritici*.

### 191 **Inference of fine-scale recombination maps**

192 We estimated and compared the local recombination rates in *Z. tritici* and *Z. ardabiliae* using  
193 two methods implemented in the program packages Ldhat (Auton and McVean 2007) and  
194 Ldhelmet (Chan et al. 2012). Both methods estimate the local population recombination

195 rates based on the LD between SNPs in a given genome dataset using a composite likelihood  
196 method. The methods infer the population-scaled recombination rate  $\rho$  across the genome,  
197 based on an a priori specified population mutation rate  $\theta$ . The parameter  $\rho$  relates to the  
198 actual recombination frequency by the equation  $\rho = 2N_e * r$  for haploid individuals, where  $N_e$   
199 is the effective population size and  $r$  is the per site rate of recombination across the region.  
200 As  $\theta$  substantially varies along genomes, we generated recombination maps using three  
201 scaled effective population size values as inputs ( $\theta = 0.05, 0.005$  and  $0.0005$ ). For both  
202 methods, we find that the three different input  $\theta$  values only have a marginal influence on  
203 the recombination rate estimates obtained from Ldhat and Ldhelmet (Fig. 1A). We therefore  
204 proceeded with the recombination map estimated using a  $\theta$  of 0.005, similar to the median  
205 of  $\theta$  values estimated in 10-kb windows in *Z. tritici* ( $\theta = 0.0139$ ) and in *Z. ardabiliae* ( $\theta =$   
206  $0.0087$ ) (Table 1).

207 To assess the performance of the two methods and the input parameters for the fungal  
208 dataset, we first compared the inferred recombination maps of *Z. tritici* with data from  
209 previously published genetic maps (Croll et al. 2015). We compared both the Ldhat and  
210 Ldhelmet recombination maps with the genetic maps created from two sexual crosses of  
211 Swiss *Z. tritici* isolates, 3D7x3D1 and SW5xSW39 (Croll et al. 2015). The two recombination  
212 maps estimated by Ldhat and Ldhelmet from SNP data both correlate with the genetic maps  
213 confirming that the composite likelihood methods allow us to assess the recombination  
214 landscapes in the fungal pathogens (Fig. 1B). We find a significant correlation between the  
215 Ldhat map and the two genetic maps (3D7x3D1, Kendall's rank correlation test,  $\tau = 0.27$ , p-  
216 value  $< 2.2e-16$  and SW5xSW39, Kendall's rank correlation test,  $\tau = 0.23$ , p-value  $< 2.2.e-16$ ).  
217 Using an average recombination rate of the 3D7x3D1 and SW5xSW39 crosses the correlation  
218 coefficient further increases (Kendall's rank correlation test,  $\tau = 0.29$ , p-value  $< 2.2.e-16$ ) (Fig.  
219 1B). While correlated, the new recombination maps of *Z. tritici* encompasses more than 1  
220 million SNPs and thereby provides a considerably finer resolution of the recombination  
221 landscape in *Z. tritici* than previously obtained from experimental crosses (based on ca  
222 23,000 SNPs) (Croll et al. 2015). The same correlation analyses using the Ldhelmet map show  
223 consistent results with slightly lower correlations (Kendall's rank correlation test,  $\tau = 0.24$  for  
224 the cross 3D7x3D1, and 0.20 for the cross SW5xSW39 and 0.25 using the average of the two  
225 crosses; all p-values  $< 2.2e-16$ ). These correlations, although highly significant, have relatively  
226 small size effects. However, it is noteworthy that also the correlation between the two Swiss  
227 crosses 3D7x3D1 and SW5xSW39 only is 0.43 (Kendall's rank correlation test, p-value  $< 2.2e-$

228 16) supporting a high variability in recombination even between individual crosses of *Z.*  
229 *tritici*.

230 Ldhat and Ldhelmet have been developed for recombination analyses in animals (Auton and  
231 McVean 2007; Auton et al. 2012; Chan et al. 2012) and their performance on data from  
232 haploid eukaryotes with high recombination rates have not been tested. Therefore, we next  
233 assessed the robustness of the composite likelihood approach with respect to sample size  
234 and SNP density. We conducted simulations to assess the power of LD-based recombination  
235 estimators under such conditions. We report that the interval program infers recombination  
236 rate with the highest reliability for intermediate diversity levels ( $\theta = 0.0005$  or  $0.005$ ).  
237 Furthermore, while larger sample size decrease the variance in estimate, we show that Ldhat  
238 reliably infers recombination when as few as 10 haploid genomes are used (Fig. 2). We  
239 observe that  $\rho$  generally tends to be underestimated and its estimation variance larger for  
240 small sample sizes. Yet better estimates can be obtained by discarding all estimates with a  
241 95% confidence interval at least equal to two times the mean. Interestingly, this filtering has  
242 the strongest effect for highly diverse regions ( $\theta = 0.05$ ), where the raw estimates of Ldhat  
243 appear to be highly underestimated even for large sample sizes ( $n = 100$ ). Discarding  
244 estimates with large confidence intervals efficiently suppress this bias (Fig. 2). We also note  
245 that the inference bias is stronger for low recombination rates, and that this effect is  
246 independent of the sample size (Fig. 2). Based on these simulation results, we similarly  
247 filtered our recombination estimates based on the 95% confidence interval reported by  
248 Ldhat. This filtering discards 49% and 20% of all SNP pairs for *Z. tritici* and *Z. ardabiliae*,  
249 respectively. The large difference between the two data sets is imputable to the much higher  
250 nucleotide diversity of *Z. tritici*. When compared with the genetic map (Croll et al. 2015), the  
251 filtered map of *Z. tritici* shows a correlation of 0.34 (Kendall's rank correlation test,  $p$ -value <  
252  $2.2e-16$ ). Interestingly, correlations between the genetic map and the linkage disequilibrium  
253 (LD) map inferred here increases with increased window size: using 500 kb windows, the  
254 correlation becomes 0.43 (Kendall's tau,  $p$ -value = 0.000206) comparable to the correlation  
255 between the two genetic maps of 3D7x3D1 and SW5xSW39.

256 Recombination inference based on patterns of linkage disequilibrium is affected by various  
257 patterns of selection. The genomes of *Z. tritici* and *Z. ardabiliae* are gene dense and protein-  
258 coding genes occupy nearly 50% of the sequences. We therefore considered the impact of  
259 selection on our recombination inference in the two species assuming lower selection in  
260 non-coding regions. To this end, we compared the previously published genetic map with  
261 estimates of  $\rho$  exclusively in the intergenic regions (excluding coding sequences and 500-bp



262 up and downstream of the annotated genes). These analyses based on non-coding  
263 sequences resulted in correlations of 0.22 for the Ldhat map and the average of the two  
264 genetic crosses (Kendall's rank correlation test,  $p$ -value  $< 2.2e-16$ ) and 0.24 for the Ldhelmet  
265 map (Kendall's rank correlation test,  $p$ -value  $< 2.2e-16$ ). Thus, the best correlations of LD  
266 based on the recombination maps and genetic crosses are obtained by complete genome  
267 data that include coding regions. The finding suggests that the composite likelihood method  
268 provides robust estimates of recombination, even in regions likely to deviate from purely  
269 neutral evolution. Based on these simulation results, we chose to use the Ldhat-inferred  
270 recombination rates on the full genome, with an input  $\theta = 0.005$  and filtered according to  
271 confidence intervals, for both *Z. tritici* and *Z. ardabiliae*.

272

### 273 **A five fold higher population scaled recombination rate in *Z. tritici***

274 The inference of  $\rho$  across the genomes of *Z. tritici* and *Z. ardabiliae* reveals highly  
275 heterogeneous recombination landscapes in both species (Fig. 3 and Supplementary Data 1).  
276 We find a five-fold higher recombination rate in *Z. tritici* than in *Z. ardabiliae*: the mean  
277 values of  $\rho$  are 0.0217 and 0.0045 for *Z. tritici* and *Z. ardabiliae*, respectively. This five-fold  
278 difference might reflect differences in actual recombination rates as well as differences in  
279 effective population sizes. The nucleotide diversity estimated by Watterson's  $\theta$ , is 1.6 times  
280 higher in *Z. tritici* than in *Z. ardabiliae*, indicating that different population sizes alone cannot  
281 explain the observed difference in recombination rates assuming that the two species have  
282 comparable mutation rates. We further note that  $r$  represents the recombination rate per  
283 generation per nucleotide. Therefore, a putative difference in number of generations per  
284 year between the two pathogens also cannot account for the observed difference. The  
285 higher value of  $\rho$  estimated in *Z. tritici* thus likely reflects a higher actual recombination rate  
286 in the wheat pathogen compared to *Z. ardabiliae*.

287

### 288 **Recombination on small arms of acro-centric chromosomes**

289 Physical factors, such as chromosome length, chromosome arm length or distance to the  
290 centromere have been reported to impact broad-scale recombination patterns in eukaryotes  
291 (Jensen-Seaman et al. 2004). To investigate the rate and distribution of crossover events  
292 along the genomes of the two *Zymoseptoria* species, we correlated the inferred  
293 recombination maps with features of the well-characterized karyotype of *Z. tritici*. The

294 reference genome sequence of *Z. tritici* consists of 21 fully sequenced chromosomes,  
295 including eight so-called accessory chromosomes (Goodwin et al. 2011a). Furthermore, the  
296 exact positions of the centromeres for all chromosomes have been characterized  
297 experimentally using a chromatin immunoprecipitation assay targeting the centromere  
298 specific protein CenH3 (Schotanus et al. 2015). An interesting finding is that the  
299 chromosomes in *Z. tritici* are either acro-centric or near-acrocentric, and every chromosome  
300 consequently consists of one long and one short chromosome arm (Schotanus et al. 2015).  
301 Because a complete chromosome assembly is not available for *Z. ardabiliae*, we mapped the  
302 recombination estimates of *Z. ardabiliae* on the genome of *Z. tritici* to assess the impact of  
303 the karyotype structure on recombination rate variation. Similar to findings from other  
304 species (Jensen-Seaman et al. 2004; Munch et al. 2014), we observe a negative correlation  
305 between recombination rate and the size of the thirteen core chromosomes (Kendall's  $\tau =$   
306  $-0.59$  with p-value =  $4.29e-3$  for *Z. tritici* and  $\tau = -0.72$  with p-value =  $2.84e-4$  for *Z. ardabiliae*;  
307 Fig. 4A). This pattern is generally explained by the necessity of one crossing over to occur per  
308 chromosome or chromosome arm per generation, resulting in a higher recombination rate  
309 on smaller chromosomes (e.g., (2004; Smeds et al. 2016; Kong et al. 2002)). The significant  
310 correlation of the recombination map of *Z. ardabiliae* with the genome structure of *Z. tritici*  
311 is an indication of a conserved karyotype of the ancestral species of *Z. tritici* and *Z.*  
312 *ardabiliae*.

313 Given the acro-centric nature of the *Z. tritici* chromosomes we considered to which extent  
314 recombination also occurs on the short chromosome arms. If meiosis involves one crossover  
315 event per chromosome, then the recombination rate should be correlated with the  
316 chromosome size and not the chromosome arm length. However, if meiosis involves one  
317 crossover event per chromosome arm, then a higher frequency of recombination should  
318 occur on shorter chromosome arms. Correlations between recombination rates and  
319 chromosome arm lengths also show negative values, yet only significant in *Z. ardabiliae*  
320 (Kendall's  $\tau = -0.14$  with p-value =  $0.3356$  for *Z. tritici* and  $\tau = -0.42$  with p-value =  $2.16e-3$  for  
321 *Z. ardabiliae*, Fig. 4B). The negative correlation observed at the chromosome arm level  
322 suggests that meiosis in the *Zyoseptoria* pathogens requires at least one crossing over per  
323 chromosome arm and that the small chromosome arms consequently also recombine. The  
324 weaker correlations and lack of significance in *Z. tritici* could be due to a fast evolution of  
325 centromere positions, erasing the signal of arm-specific recombination rates.

326

## 327 **No association between recombination rate and GC content in *Z. tritici* and *Z. ardabiliae***

328 In many species recombination strongly impacts evolution of GC content by a mechanism  
329 called GC biased gene conversion (gBGC) (Duret and Galtier 2009; Mugal et al. 2015). The  
330 effect of gBGC has been demonstrated in mammals (Duret and Galtier 2009; Piganeau et al.  
331 2002), birds (Weber et al. 2014), plants (Serres-Giardi et al. 2012) and even bacteria (Lassalle  
332 et al. 2015). However, gBGC has never been assessed in fungal species beyond the yeast  
333 model, which represents one of the rare organisms for which gBGC was experimentally  
334 demonstrated (Mancera et al. 2008). To study the possible occurrence and impact of gBGC in  
335 the *Z. tritici* and *Z. ardabiliae* genomes, we studied the patterns of GC content along the  
336 genomes of the two species. We fitted a non-homogeneous, non-stationary model of  
337 substitution in 10 kb windows in intergenic regions allowing us to estimate the equilibrium  
338 GC content (frequency of GC towards which the sequences evolve) in the extant species. We  
339 inferred the dynamics of GC content by comparing the actual GC content of the sequence  
340 (observed GC content) with the equilibrium GC content (Duret and Arndt 2008). We find that  
341 both the observed and equilibrium GC are highly correlated between *Z. tritici* and *Z.*  
342 *ardabiliae* (Supplemental Fig. 1, Kendall's rank correlation test,  $\tau = 0.69$  and  $0.45$ , p-values <  
343  $2.2e-16$  for the observed and equilibrium GC content, respectively, essential chromosomes  
344 only). However, although both species show similar observed GC content (mean of 53.3% for  
345 *Z. tritici* and 53.6% for *Z. ardabiliae*) they also show contrasting patterns, with the GC content  
346 found to be slightly increasing in *Z. ardabiliae* (mean equilibrium GC content on autosomes  
347 of 53.2, significantly higher than the observed GC content, Wilcoxon paired rank test, p-value  
348 = 0.04712) while decreasing in *Z. tritici* (mean equilibrium GC content of 51.6%, which is  
349 significantly lower than the observed GC content, Wilcoxon paired rank test, p-value =  
350  $2.728e-15$ ).

351 To assess the impact of recombination on GC evolution we correlated the equilibrium GC  
352 content in *Z. tritici* and *Z. ardabiliae* to the recombination maps in the two species. We find  
353 overall negative yet weakly or non-significant correlations between GC content and  
354 recombination rate (Supplemental Fig. S1), both for observed (Kendal's tau = -0.05, p-value =  
355 0.0404 for *Z. tritici* and tau = -0.05, p-value = 0.02253 for *Z. ardabiliae*) and equilibrium GC  
356 content (Kendal's tau = -0.02, p-value = 0.5082 for *Z. tritici* and tau = 0.01, p-value = 0.7128  
357 for *Z. ardabiliae*).

358 Together these results do not support GC-biased gene conversion as a major mechanism  
359 shaping GC content in the two fungal pathogen genomes. To test whether this conclusion

360 could be an artifact of recombination rates estimated from population data, we also  
361 correlated the equilibrium GC content with the two previously published genetic maps (Croll  
362 et al. 2015). Consistent with our finding from the Ldhat-based recombination map, we  
363 confirm an absence of correlation between the equilibrium GC content and the crossing-over  
364 rate and GC content in *Z. tritici*, (Kendall's rank test,  $\tau = 0.006$  and p-value = 0.7035 for  
365 observed GC and  $\tau = -0.024$ , p-value = 0.1149 for equilibrium GC content) supporting an  
366 absence or little effect of GC-biased gene conversion in *Z. tritici* and *Z. ardabiliae*.

367

### 368 **No suppression of recombination in centromeres**

369 Recombination is normally found to be absent in centromeric regions where spindles attach  
370 during chromosome segregation (see review by (Petes 2001)). A known exception is  
371 *Drosophila mauritiana*, which, in contrast to *Drosophila melanogaster* and *Drosophila*  
372 *simulans*, shows no suppression of recombination in centromeres (True et al. 1996). The  
373 centromeres of core and accessory chromosomes in *Z. tritici* range from 5.5 kb to 14 kb in  
374 size and do not locate in AT rich regions (Schotanus et al. 2015) as is otherwise observed for  
375 centromeres of other species such as *Neurospora crassa* (Smith et al. 2011). Correlating the  
376 recombination map of *Z. tritici* with centromere positions, we observe, as in *D. mauritiana*,  
377 no significant suppression in recombination rate across the centromeric chromosome  
378 regions (Wilcoxon signed rank test on 11 chromosomes for which recombination rate in the  
379 centromeric region could be inferred, p-value = 0.5771) (Table 2, Fig. 3). The centromeres of  
380 *Z. tritici* exhibit several features common to neocentromeres such as a short length (approx.  
381 10,000 bp in length), lack of enriched repetitive DNA and weakly transcribed genes  
382 (Schotanus et al. 2015). We hypothesize that recombination in centromeric sequences has  
383 additional implications for evolution of the centromeres in these fungi. A more detailed  
384 characterization of chromosome structures and centromere locations in *Z. ardabiliae* is  
385 necessary to better understand karyotype evolution in these grass pathogens.

386

### 387 **Absence of recombination on accessory chromosomes**

388 The small accessory chromosomes have previously been well characterized in *Z. tritici*  
389 (Goodwin et al. 2011a). They differ considerably from the core chromosomes as they display  
390 a higher repeat content, lower gene density, overall lower transcription rate and are enriched

391 with different chromatin modifications (Stukenbrock et al. 2010; Kellner et al. 2014;  
392 Grandaubert et al. 2015; Schotanus et al. 2015). Electrophoretic separation of accessory  
393 chromosomes from several isolates of *Z. ardabiliae* have shown this species also comprises  
394 accessory chromosomes (Stukenbrock et al. 2011). In this study we used sequence homology  
395 to define the accessory components of the *Z. ardabiliae* genome. We find that the aligned  
396 fragments of the accessory chromosomes show very low recombination rates in both species  
397 (median  $\rho = 0.0059$  in *Z. tritici* and median  $\rho = 0.0001$  in *Z. ardabiliae* over 13 10-kb windows  
398 where both genomes could be aligned, which is 25% and 2% of the autosomal rates,  
399 respectively) (Fig. 4C). The lower recombination rates reflect the lower effective population  
400 size of accessory chromosomes that are present at lower frequencies in populations of *Z.*  
401 *tritici* and *Z. ardabiliae* compared to the core chromosomes. Furthermore we speculate that  
402 frequent structural rearrangements on accessory chromosomes can prevent homologous  
403 chromosomes pairings and also contribute to the low recombination rates. Our findings add  
404 further evidence to support different evolutionary modes of the two sets of chromosomes  
405 (core and accessory chromosomes) contained in the same genome. As observed on the  
406 accessory chromosomes, suppression of recombination is also found on mating-type  
407 chromosomes in other fungi including species of *Neurospora* and *Microbotryum* (Hood et al.  
408 2013; Petit et al. 2012; Whittle and Johannesson 2011). These regions are characterized by  
409 an increased accumulation of transposable elements and structural variants as well as non-  
410 adaptive mutations in coding sequences (Badouin et al. 2015; Whittle et al. 2011; Whittle  
411 and Johannesson 2011).

412 We also observe a remarkable drop in the recombination rate on the right arm of  
413 chromosome 7 (Supplemental Data 1). The right arm of chromosome 7 displays several  
414 similarities to the DNA of the accessory chromosomes including a lower gene density, higher  
415 repeat content and less gene transcription (Grandaubert et al. 2015). Furthermore, the  
416 entire chromosome arm is enriched with the heterochromatic mark H3K27me3, which is  
417 similarly enriched on the accessory chromosomes (Schotanus et al. 2015). We previously  
418 proposed that this particular chromosome region represents a recent translocation of an  
419 accessory chromosome to a core chromosome (Schotanus et al. 2015). This hypothesis is  
420 consistent with the observation that the recombination rate of the chromosome arm  
421 resembles the overall reduced recombination rate of the accessory chromosomes  
422 (Supplemental Data 1).

423

#### 424 **High recombination rates in coding sequences of *Z. tritici***

425 In primates and birds, recombination increases at CpG islands and around transcription start  
426 and end sites (Auton et al. 2012; Singhal et al. 2015; Smeds et al. 2016). In honeybee  
427 recombination rates in introns and intergenic regions are significantly higher than  
428 recombination rates in 3' and 5' UTRs and coding sequences (Wallberg et al. 2015). It has  
429 been proposed that altered chromatin structures such as destabilized nucleosome  
430 occupancy at CpG islands and promoters contribute to this fine-scale variation in  
431 recombination rate (Jones 2012). To determine whether specific sequence features in the  
432 fungal pathogen genomes similarly affect the overall recombination landscape, we inferred  
433 and compared the mean recombination rates in exons, introns, intergenic regions, and 5' and  
434 3' flanking regions with a minimum of 3 filtered SNPs (500-bp upstream and downstream  
435 CDS regions, respectively, Fig. 5A). Overall, we observe significant differences but with small  
436 size effects in fine-scale rates of recombination across different genome regions (Kruskal-  
437 Wallis test with post-hoc comparisons, FDR set to 1%). In both *Z. tritici* and *Z. ardabilliae* we  
438 find the lowest recombination rates in introns and the highest rates in intergenic sequences  
439 (Fig. 5A). A lower value of  $\rho = 2.N_e.r$  can result from a reduced  $N_e$ , a reduced  $r$  or both.  $N_e$   
440 in the proximity of genes is expected to be lower due to the presence of background selection  
441 (Nordborg et al. 1996; Scally et al. 2012; Hobolth et al. 2011). The highly similar observed  
442 recombination rates in coding and non-coding sequences in *Z. tritici* and *Z. ardabilliae*  
443 suggests that  $r$  is not suppressed in these regions in the same way as observed in other  
444 organisms. The pattern indicates that different mechanisms define fine-scale recombination  
445 rates in these fungi leading to high recombination frequencies in protein-coding sequences.

446 Because of the relatively high rates of recombination in exons of *Z. tritici* and *Z. ardabilliae*,  
447 we sought to determine whether recombination could play a particular role in plant-  
448 pathogen co-evolution. Plant pathogens interfere with host defenses and manipulate the  
449 host metabolism by the secretion of so-called effector proteins produced to target molecules  
450 from the host (Lo Presti et al. 2015). Antagonistic co-evolution of these interacting proteins is  
451 often reflected in accelerated evolution and signatures of positive selection (Stukenbrock  
452 and McDonald 2009). To assess the role of recombination on effector evolution, we first  
453 predicted effector proteins computationally in the secretomes of both species using the  
454 EffectorP software (Sperschneider et al. 2016). This approach identified 868 putative effector  
455 proteins in *Z. tritici* and 1,122 in *Z. ardabilliae*.

456 By comparing the recombination rates in different genetic regions for effector and non-  
457 effector encoding genes, we show a significantly lower recombination rate in exons and  
458 introns for effector proteins in *Z. ardabiliae* (Wilcoxon rank test, p-value = 1.305e-4 (exons)  
459 and 2.534e-5 (introns), p-values corrected for multiple testing) (Fig. 5B). These differences  
460 are mostly driven by an excess of zero estimates in these regions, as visible on the  
461 distribution of measures (Fig. 5B). Discarding these regions with a mean recombination of  
462 zero leads to non-significant differences between effector and non-effector genes. A  
463 recombination rate estimated to zero can either be due to suppression of recombination in  
464 the region or to an estimation error. Intron and exons with a recombination estimate of zero  
465 in *Z. ardabiliae* are found to be shorter and to have a higher SNP density (Supplementary  
466 Data 3). While these differences are significant, they are of a small size and are unlikely to be  
467 a cause of estimation error, and the suppression of recombination in some effector genes of  
468 *Z. tritici* therefore appears as a biological signal which origin remains to be elucidated.

469

#### 470 **Large scale but not fine scale correlation of recombination landscapes in *Z. tritici* and *Z.*** 471 ***ardabiliae***

472 Recombination landscapes have been compared in different model species to assess the  
473 extent of conservation of recombination rate variation. Broad-scale recombination rates in  
474 zebra finches and long-tailed finches have similar levels and present correlation factors as  
475 high as 0.82 and 0.86 at the 10-kb and 1-Mb scales, respectively (Singhal et al. 2015).  
476 Similarly, broad-scales recombination rates in human and chimpanzee tend to be conserved  
477 with few exceptions such as the human chromosome 2, which originates from a  
478 chromosome fusion in the human lineage (Auton et al. 2012). However, when comparing the  
479 recombination rates of more distantly related mammal species, the correlation of  
480 recombination rates decreases even when comparing homologous syntenic blocks (Jensen-  
481 Seaman et al. 2004). In studies of mammals and fruit flies, it is considered that the  
482 recombination landscape evolves as a results of evolution of other sequence variables  
483 (Jensen-Seaman et al. 2004), and the dynamics of fine-scale recombination rates including  
484 the positions of hotspots (Winckler et al. 2005; Chan et al. 2012).

485 To address the evolution of recombination landscapes in *Z. tritici* and *Z. ardabiliae* we  
486 compared the genome-wide recombination maps of the two species. We previously showed  
487 that the genomes of the two species show a high extent of co-linearity and we found a mean  
488 sequence divergence of  $d_{xy} = 0.13$  substitutions per site (Stukenbrock et al. 2011). Here, we

489 first aligned the two reference genomes of *Z. tritici* and *Z. ardabiliae* to compare  
490 recombination rates in homologous genome regions (Fig. 6, see Materials and Methods).  
491 Next, we calculated the average recombination rate in non-overlapping windows with at  
492 least 100 SNPs in each species, which resulted in 3,851 windows for which recombination in  
493 both species could be averaged. The two maps show a moderate yet highly significant  
494 correlation (Kendall's rank correlation test,  $\tau = 0.2327$ , p-value < 2.2e-16, Fig. 7A), which  
495 suggests certain similarities in the recombination landscape of the two fungi. To determine  
496 the scale at which the maps are most correlated (broad or fine-scale recombination rates),  
497 we further investigated how the correlations vary with the scale at which the comparison is  
498 performed. We find that the correlations, consistently inferred with different correlation  
499 measures, peak at 0.5-1 Mb scale (Fig. 7B), suggesting that the recombination landscape is  
500 conserved at large scales but shows rapid evolution at smaller scales. These results mirror  
501 findings from other eukaryotic species (e.g., (Winckler et al. 2005; Singhal et al. 2015)) and  
502 suggest that distinct mechanisms determine the recombination landscape at fine and broad  
503 scales in these two species.

504

#### 505 **Frequency and intensity of recombination hotspots is higher in *Z. tritici***

506 The fine scale  $Ld_{hat}$  recombination maps clearly reveal the presence of distinct peaks of  
507 recombination in both *Z. tritici* and *Z. ardabiliae* (Fig. 3). We used the program  $Ld_{hot}$  to call  
508 positions of statistically significant recombination hotspots (Auton et al. 2014) and applied  
509 highly stringent selection criteria (see Materials and Methods) to obtain positions of the  
510 most significant hotspots in *Z. tritici* and *Z. ardabiliae* (Fig. 8A). Interestingly, our approach  
511 revealed a considerably greater number of recombination hotspots in *Z. tritici* (2,578  
512 hotspots) than in *Z. ardabiliae* (862 hotspots). Furthermore, we find a significant difference  
513 in the size of the hotspot regions between the two species. In general, the recombination  
514 hotspots span significantly shorter regions in *Z. tritici* (median 39 base pairs) than in *Z.*  
515 *ardabiliae* (66 base pairs, Wilcoxon ranked test p-value < 2.2e-16). We also compared the  
516 intensity of the recombination hotspots, as estimated by  $Ld_{hot}$  ( $\rho$  across hotspot) and also  
517 find the median value of  $\rho$  in hotspots to be significantly higher in *Z. tritici* (median of 16.44  
518 compared with 8.42 for *Z. ardabiliae*, Wilcoxon rank test p-value < 2.2e-6). The higher  
519 frequency of more intense hotspots in *Z. tritici* not only reveals a different hotspot landscape  
520 in the wheat pathogen; it also suggests that the overall higher recombination rate we  
521 observe in *Z. tritici* partly is explained by the different recombination hotspots architecture.



522 While the differences to some extent can mirror the larger density of SNPs in *Z. tritici* that  
523 enables a finer resolution of the hotspot distribution and structure, we also speculate that  
524 recombination hotspots in these fungi have evolved since the divergence of *Z. tritici* and *Z.*  
525 *ardabiliae*. To address the extent of conservation in hotspot positions, we correlated the  
526 hotspot maps of the two species.

527 The position of recombination hotspots is defined by different mechanisms in different taxa,  
528 e.g. PRDM9 in primates and transcription start and end sites in other species such as birds  
529 (Myers et al. 2005; Singhal et al. 2015). Consequently, hotspot positions are highly conserved  
530 in some species (Singhal et al. 2015), and highly variable in other species (Myers et al. 2010).  
531 We mapped *Z. ardabiliae* hotspots on the *Z. tritici* genomes and counted the numbers of co-  
532 localizing hotspots in the two species. We considered that a hotspot in *Z. tritici* as co-  
533 localizing with a hotspot in *Z. ardabiliae* if the distance between the two hotspots is less than  
534 1kb and if not other hotspot is present in between. We report that only 149 hotspots are co-  
535 localizing (6% of hotspots in *Z. tritici* and 20% of hotspots in *Z. ardabiliae*). This number is  
536 however significantly more than expected by chance (p-value < 9.99e-5, permutation test,  
537 Fig. 8B). These results are consistent with the previously reported genetic maps of *Z. tritici*,  
538 which also show little overlap of hotspots positions between two Swiss crosses (Croll et al.  
539 2015). Conversely, the patterns are highly different from *Saccharomyces* species in which  
540 hotspot positions are highly conserved and associated with functional elements across the  
541 yeast genomes (Tsai et al. 2010).

542 Given the dense genomes of *Z. tritici* and *Z. ardabiliae* we assessed the number of hotspots  
543 mapped to coding sequences. Of the 2,578 *Z. tritici* hotspots, 132 are located in introns and  
544 1,435 are located in exons. Interestingly, in *Z. ardabiliae* we find 44 hotspots in introns and  
545 only 396 in exons. We plotted the number of hotspots as a function of the number of called  
546 sites in each region (Fig. 8C). We observe a general trend in which the number of detected  
547 hotspots increases with the number of called sites as a power law (linear relationship in log  
548 space), and with more hotspots detected in *Z. tritici*. In contrast to patterns of previously  
549 studied species, this reveals the presence of hotspots in all parts of the genome, including  
550 coding regions. We do not observe a significant enrichment close to transcription start site  
551 (upstream regions) like in yeast (Lam and Keeney 2015). We further note that comparatively  
552 fewer hotspots locate in intergenic regions of *Z. tritici*, these regions displaying a density of  
553 hotspots similar to what is expected in *Z. ardabiliae* for the observed number of callable  
554 sites. We hypothesize two non-exclusive possible origins for this result: (1) the number of  
555 callable sites is higher in *Z. tritici* intergenic regions than in *Z. ardabiliae*, due to the lack of

556 telomere-to-telomere assembly of a reference genome for this species. The missing regions  
557 could potentially bias our estimate of hotspot densities in intergenic regions. (2) another  
558 possible explanation is that the comparatively larger number of hotspots in *Z. tritici* is due to  
559 an increased hotspot density in protein-coding genes in this species, which raises the  
560 question whether intragenic recombination hotspots represent a selected feature during  
561 evolution of the wheat-infecting lineage.

562

## 563 Conclusions

564 Pathogens need to adapt rapidly to overcome immune responses in their host (Jones and  
565 Dangl 2006). Several examples from animal and plant pathogens document exceptionally  
566 high rates of genome re-arrangements including changes in ploidy and full chromosome  
567 gains or losses (e.g., (Hickman et al. 2013, 2015; Ma et al. 2010; Croll et al. 2013)). So far the  
568 importance of meiotic recombination in rapid evolution of pathogens has been poorly  
569 addressed. Our analyses demonstrate extraordinary high recombination rates in two fungal  
570 plant pathogens and thereby suggest that sexual recombination also can be a major driver of  
571 rapid pathogen evolution.

572 The overall higher recombination rate and the increased density of recombination hotspots  
573 in the crop pathogen *Z. tritici* are remarkable. *Z. tritici* and *Z. ardabiliae* share a recent  
574 common ancestor, but exist and evolve in highly different environments. While *Z. ardabiliae*  
575 infects wild grasses in a natural ecosystem, *Z. tritici* infects a crop host and propagate only in  
576 managed ecosystems. Agricultural management strategies, dense host populations and  
577 increased gene flow between geographically distant populations are factors that contribute  
578 to a different population structure of *Z. tritici*. We hypothesize that an increased rate of  
579 recombination in coding sequences of *Z. tritici* was selected as it favored the rapid  
580 generation of new alleles and allele combinations (Brunner et al. 2008). The exceptionally  
581 high recombination rate in *Z. tritici* allows the pathogen to rapidly overcome new host  
582 resistances and explains the current difficulties of controlling this important wheat pathogen.

583

## 584 Materials and methods

### 585 **Genome data**

586 The lifecycle of *Z. tritici* is predominantly haploid and the genome analyses conducted here  
587 thus rely on haploid genome data. The 40-Mb reference genome of the *Z. tritici* isolate

588 IPO323 was sequenced at the Joint Genome Institute using Sanger sequencing (Goodwin et  
589 al. 2011a). Two Iranian *Z. tritici* isolates and four Iranian *Z. ardabiliae* isolates were  
590 sequenced in a previous study using Illumina sequencing (Table S1) (Stukenbrock et al. 2011).  
591 We used genome data from an additional ten isolates of *Z. tritici* that originate from wheat  
592 fields in Denmark, France and Germany (Grandaubert, Dutheil and Stukenbrock, in prep). In  
593 this study, we report the genome sequences of thirteen isolates of *Z. ardabiliae* that originate  
594 from wild grasses collected in the province of Ardabil in Iran (Table S1). DNA extraction was  
595 performed as previously described (Stukenbrock et al. 2011). Library preparation and paired  
596 end sequencing using an Illumina HiSeq2000 platform were conducted at Aros, Skejby,  
597 Denmark. Sequence data has been deposited under the NCBI BioProject IDs PRJNA277174.

598 The thirteen *Z. ardabiliae* re-sequenced genomes were assembled from 100 bp paired end  
599 reads using the de novo assembly algorithm of the CLC Genomics Workbench version 5.5  
600 (Qiagen, Aarhus, Denmark). The assemblies were created using standard settings for paired-  
601 end reads. We used a previously published RNAseq based annotation to distinguish the  
602 parameter estimates for coding and non-coding sequences (Grandaubert et al. 2015). To  
603 predict the genes that encode effectors we used the software EffectorP (Sperschneider et al.  
604 2016) with default settings, on sequence predicted to be secreted by SignalP (Petersen et al.  
605 2011)

606

#### 607 **Genome alignment and SNP calling**

608 Genome alignments were separately created for each population using the MultiZ program  
609 from the TBA package (Blanchette et al. 2004). Default parameters were used, although LastZ  
610 was used instead of BlastZ for pairwise alignments. Genome alignments were projected  
611 against the two reference genomes of each species: IPO123 for *Z. tritici* and STO4IR-1.1.1 for  
612 *Z. ardabiliae* (Goodwin et al. 2011a; Stukenbrock et al. 2011). The projected alignments in  
613 MAF format were filtered using the MafFilter program [27] with the following filters: 1) each  
614 syntenic block was realigned using Mafft (Katoh et al. 2009), and blocks with more than 10  
615 kb were split for computer efficiency; 2) only blocks where all individuals were present were  
616 retained (13 *Z. tritici* and 17 *Z. ardabiliae*); 3) a window of 10 bp was slid by 1 bp, and  
617 windows containing at least one position with gaps in at least 2 species were discarded and  
618 the containing blocks were split; 4) a window of 10 bp was slid by 1 bp, and windows with a  
619 total of more than 100 gaps were discarded and the containing blocks were split; and 5) all  
620 blocks were merged according to the reference genome with empty positions filled by 'N',

621 which resulted in one masked alignment per chromosome for *Z. tritici* and one masked  
622 alignment per contig for *Z. ardabiliae*. The chromosome and contig alignments were further  
623 divided in non-overlapping windows of 1 Mb (data set 1) or 100 kb (data set 2). The MafFilter  
624 program was further used to estimate statistics on the alignments at each filtering step, and  
625 to compute the nucleotide diversity (Watterson's  $\theta$ ) from the final filtered genome  
626 alignments.

627

### 628 **Estimating recombination**

629 Filtered alignments (1-Mb windows, data set 1) were exported as fasta files for the Ldhat and  
630 Ldhelmet packages. The program *convert* from the Ldhat package was used to convert fasta  
631 files into input loci files for the program *interval* (Auton and McVean 2007). Only fully  
632 resolved biallelic positions were exported (see Table 1 for the details of SNP numbers).  
633 Likelihood tables were generated for  $\theta$  values of 0.0005, 0.005 and 0.05. The *interval*  
634 program was run with 10,000,000 iterations and sampled every 5,000 iterations with a burn-  
635 in of 100,000 iterations. Ldhelmet was run with the parameters suggested in the user manual  
636 ((Chan et al. 2012) and <https://sourceforge.net/projects/ldhelmet/>). We calculated average  
637 recombination rates in windows and regions by taking the average of recombination  
638 estimates between every pairs of SNPs, weighted by the physical distance between the SNPs.  
639 Pairs of SNPs for which the confidence interval of the recombination estimate was higher  
640 than two times the mean were discarded and therefore not used in the average  
641 computation. Using the gene annotations available for the two reference species  
642 (Grandaubert et al. 2015), we calculated the following information for each gene: 1) the  
643 average recombination rate in exons, 2) the average recombination rate in introns, and 3) the  
644 average recombination rate in the 500 bp flanking 5' region and 4) in the 500 bp flanking 3'  
645 region. We also calculated the average recombination rate for each intergenic region (500 bp  
646 from / to genes). GFF3 files from (Grandaubert et al. 2015) were retrieved and processed  
647 using the "genometools" package to add intron annotations (Gremme et al. 2013). The  
648 resulting gene annotations were analyzed in R together with recombination maps (R Core  
649 Team 2013).

650

### 651 **Assessment of LD-based recombination estimates by simulation**

652 We used the SCRM coalescent simulator (Staab et al. 2015) in order to simulate  
653 polymorphism data with a constant mutation rate but variable recombination rate.

654 Recombination rates were drawn randomly from an exponential distribution with mean 0.02.  
655 Segments with piecewise constant recombination rate were taken randomly from an  
656 exponential distribution with mean 100 kb. Sample sizes of 10, 30 and 100 individuals were  
657 tested for comparison, with a population mutation rate equal to 0.05, 0.005, 0.0005 and  
658 0.00005. We generated a locus of 10 Mb for simulations with  $\theta$  equal to 0.005, 0.0005 and  
659 0.00005, but only 1 Mb for simulations with  $\theta$  equal to 0.05, as the resulting output file from  
660 Ldhat would otherwise become excessively large due to the high number of SNPs. The exact  
661 recombination rate used at each position of the alignment was recorded for later  
662 comparison. The output of SCRM was converted to Ldhat input format using python scripts.  
663 Recombination rates were estimated using the interval program from the Ldhat package  
664 (Auton and McVean 2007). For simulations with  $\theta = 0.05$  and 0.005 a likelihood lookup table  
665 with  $\theta = 0.01$  was used, whereas a lookup table with  $\theta = 0.001$  was used for simulations  
666 with  $\theta = 0.0005$  and 0.00005. The inferred recombination rate at each position was then  
667 compared to the real rate.

#### 668 **Reference species alignment and comparison**

669 The two reference strains IPO323 (*Z. tritici*) and ST11IR-11.4.1 (*Z. ardabiliae*) were aligned  
670 using LastZ (Blanchette et al. 2004). The resulting genome alignment was used to map the  
671 coordinates of *Z. ardabiliae* SNPs to the *Z. tritici* genome, using the MafFilters “lift-over” filter  
672 (Dutheil et al. 2014). A total of 893,171 (86%) positions could be mapped from *Z. ardabiliae*  
673 to *Z. tritici* and were used for further analyses. Non-overlapping windows containing at least  
674 100 analysed SNPs in each species were generated for the comparison of recombination  
675 rates between the two species.

676

#### 677 **Multi-scale correlations**

678 We calculated the average recombination rates in windows of varying sizes and retained only  
679 windows that contained at least 1% of the window polymorphic positions. To enforce a  
680 similar statistical power among different window sizes, a number of windows were chosen  
681 randomly. The same number of randomly chosen windows was used for the distinct  
682 comparisons. To assess the sampling variance, 1,000 independent samplings (with  
683 replacement) were performed for each window size. Window sizes of 0.5, 1, 2, 4, 8, 16, 32,  
684 64, 128, 256, 512 and 1,024 kb were tested, with 27 windows sampled in each case. We  
685 measured correlation coefficients using the Spearman, Kendall and Pearson's correlation  
686 coefficients. Spearman and Kendall's coefficients are ranked-based; therefore they do not

687 assume bi-normality as Pearson's coefficient does. Because recombination rates are typically  
688 exponentially distributed, Pearson's coefficient was measured for the log rates instead of the  
689 raw  $\rho$  rates. Spearman's coefficient assumes that the variables are continuously distributed;  
690 therefore it does not resolve ties. Thus jittering was used to randomly resolve ties in the  
691 input variables (R function 'jitter', with default parameters). Conversely, Kendall's coefficient  
692 assumes ordinal input variables. Therefore, using the three correlation measures allows to  
693 assess the robustness of the correlation signal. A graphical representation was performed  
694 using the ggplot2 package for R, which performed local polynomial regression fitting for the  
695 curves and their confidence intervals (Wickham 2016).

696

### 697 **Mapping of hotspots**

698 Hotspots were detected using the Ldhot program (Auton et al. 2014). For computational  
699 efficiency, Ldhot was run on the 100 kb alignments (data set 2). A background recombination  
700 map was first estimated for each alignment using the *interval* program of Ldhat with a  $\theta$   
701 value of 0.005 [28]. The resulting maps were highly correlated with the maps based on 1-Mb  
702 alignments and showed little effect of the discretization scheme. The background  
703 recombination map was used as input to Ldhot with default parameter values and 1,000  
704 simulations.

705 Significant hotspots were filtered for further analysis. First, only the hotspots with a value of  
706  $\rho$  between 5 and 100 across the hotspot coordinates were selected because higher values  
707 are most likely artifacts and the performance of Ldhot is low for weak hotspots (Auton et al.  
708 2014). A few hotspots with extremely large sizes ( $> 2$  kb) were further discarded. This  
709 process identified 9,133 hotspots in *Z. tritici* and 1,287 hotspots in *Z. ardabiliae*. We  
710 calculated the mean background rate in each detected hotspot and in the two 20-kb flanking  
711 regions. We further selected hotspots for which the within-hotspot rate was at least ten  
712 times higher than the flanking regions. Thus 2,578 and 862 hotspots were identified in *Z.*  
713 *tritici* and *Z. ardabiliae*, respectively. The *Z. ardabiliae* hotspots were mapped onto the *Z.*  
714 *tritici* genome using MafFilter's liftover function (Dutheil et al. 2014). We considered a  
715 hotspot in *Z. tritici* as co-localizing with a hotspot in *Z. Ardabiliae* if the distance between  
716 them was less than 1kb, and if no other hotspot was found between the two. We compared  
717 statistics on the distribution of hotspots by randomizing the hotspot positions while keeping  
718 their original size, for each chromosome independently. In order to do so, we used the  
719 following procedure:

720 1) compute the total “inter-hotspots” distance,  $L$ , as the sum of all distances between  
721 consecutive hotspots,

722 2) draw random distinct positions uniformly in  $[1 - L]$ . These positions are the starting  
723 positions of each randomized interval,

724 3) order, then expand each interval to match its original size and compute the corresponding  
725 end positions. Correct the coordinates in order to account for previous intervals.

726 We assessed the significance of the number of co-localizing hotspots using 10,000  
727 permutations. The corresponding R scripts are available as Supplementary Data 3.

728

### 729 **Models of GC content evolution**

730 The two reference strains IPO323 (*Z. tritici*) and ST11IR-11.4.1 (*Z. ardabiliae*) were aligned  
731 using LastZ (Blanchette et al. 2004). Several filtering steps were further applied to the  
732 alignment. First, each synteny block was realigned using the MAFFT aligner (Kato et al.  
733 2009) after splitting block longer than 10 kb for computational efficiency, which resulted in  
734 an alignment of 27,918,318 bp that included both species. Second, a window of 30 bp was  
735 slid by 1 bp along the alignment. Windows with more than 29 gaps were further discarded,  
736 which resulted in 27,237,601 filtered positions. To minimize the effect of selection on GC  
737 patterns, we further discarded regions in the alignment that were annotated as protein-  
738 coding genes in one or both species. This resulted in a total alignment of 9,143,114 bp. The  
739 alignment was further divided into windows ranging from 1 to 4 kb and only data from the  
740 essential chromosomes (*Z. tritici* chromosomes 1 to 13) were retained. The final alignment  
741 contained 2,052 cleaned windows containing sequences for both species with no synteny  
742 break, and it encompassed 3,179,581 bp. A model of sequence evolution was independently  
743 fitted on each window using maximum likelihood (Dutheil and Boussau 2008). The HKY85  
744 model was used as a basis allowing three frequency parameters ( $(G + C) / (A + C + G + T)$ ,  $A /$   
745  $(A + T)$  and  $G / (G + C)$ ) in addition to the transition over transversion ratio (Hasegawa et al.  
746 1985). We fitted a non-homogeneous, non-stationary model of substitution, allowing us to  
747 estimate three distinct GC contents for *Z. tritici*, *Z. ardabiliae* and their common ancestor.  
748 Other parameters were consider constant between species and their ancestor. A molecular  
749 clock was assumed (so that the two branches leading to *Z. tritici* and *Z. ardabiliae* were equal  
750 in length) and a 4 classes gamma distribution of rates with a shape parameter fixed to 0.5  
751 was used. We further calculated the observed GC content in each species for each window.

752 The average recombination rate was calculated for each windows containing at least 1%  
753 polymorphic position (leaving 1,642 windows).

754 As similar analysis was conducted using recombination rate estimated from (Croll et al. 2015)  
755 which were calculated in 20 kb windows. The corresponding pairwise alignment regions  
756 were extracted and filtered, and coding regions from both species were discarded, which  
757 resulted in 1,948 windows of at least 1 kb where a non-homogeneous, non-stationary model  
758 of substitution could be fitted.

759

## 760 **Acknowledgements**

761 EHS is supported by intramural funding from the Max Planck Society, Germany and a  
762 personal grant from the State of Schleswig-Holstein, Germany. JYD is supported by  
763 intramural funding from the Max Planck Society, Germany. The authors thank Daniel Croll  
764 for providing genetic data from experimental crosses of *Z. tritici*.

765

## 766 **Literature**

- 767 Auton A, Fledel-Alon A, Pfeifer S, Venn O, Ségurel L, Street T, Leffler EM, Bowden R, Aneas I,  
768 Broxholme J, et al. 2012. A Fine-Scale Chimpanzee Genetic Map from Population  
769 Sequencing. *Science* (80- ) **336**: 193–198.
- 770 Auton A, McVean G. 2007. Recombination rate estimation in the presence of hotspots.  
771 *Genome Res* **17**: 1219–1227. <http://genome.cshlp.org/content/17/8/1219.abstract>.
- 772 Auton A, Myers S, McVean G. 2014. Identifying recombination hotspots using population  
773 genetic data. *arXiv Prepr arXiv14034264*.
- 774 Awadalla P. 2003. The evolutionary genomics of pathogen recombination. *Nat Rev Genet* **4**:  
775 50–60.
- 776 Badouin H, Hood ME, Gouzy J, Aguilera G, Siguenza S, Perlin MH, Cuomo CA, Fairhead C,  
777 Branca A, Giraud T. 2015. Chaos of rearrangements in the mating-type chromosomes of  
778 the anther-smut fungus *Microbotryum lychnidis-dioicae*. *Genetics* **200**: 1275–1284.
- 779 Begun DJ, Aquadro CF. 1992. Levels of naturally occurring DNA polymorphism correlate with  
780 recombination rates in *D. melanogaster*. *Nature* **356**: 519–520.
- 781 Betancourt AJ, Welch JJ, Charlesworth B. 2009. Reduced Effectiveness of Selection Caused by  
782 a Lack of Recombination. *Curr Biol* **19**: 655–660.



- 783 Blanchette M, Kent WJ, Riemer C, Elnitski L, Smit AFA, Roskin KM, Baertsch R, Rosenbloom K,  
784 Clawson H, Green ED, et al. 2004. Aligning Multiple Genomic Sequences With the  
785 Threaded Blockset Aligner. *Genome Res* **14**: 708–715.
- 786 Broman KW, Murray JC, Sheffield VC, White RL, Weber JL. 1998. Comprehensive Human  
787 Genetic Maps: Individual and Sex-Specific Variation in Recombination. *Am J Hum Genet*  
788 **63**: 861–869.
- 789 Brunner PC, Stefanato FL, McDonald BA. 2008. Evolution of the CYP51 gene in  
790 *Mycosphaerella graminicola*: evidence for intragenic recombination and selective  
791 replacement. *Mol Plant Pathol* **9**: 305–316.
- 792 Chan AH, Jenkins PA, Song YS. 2012. Genome-Wide Fine-Scale Recombination Rate Variation  
793 in *Drosophila melanogaster*. *PLoS Genet* **8**: e1003090.
- 794 Choi K, Zhao X, Kelly KA, Venn O, Higgins JD, Yelina NE, Hardcastle TJ, Ziolkowski PA,  
795 Copenhagen GP, Franklin FCH, et al. 2013. Arabidopsis meiotic crossover hot spots  
796 overlap with H2A.Z nucleosomes at gene promoters. *Nat Genet* **45**: 1327–1336.
- 797 Croll D, Lendenmann MH, Stewart E, McDonald BA. 2015. The Impact of Recombination  
798 Hotspots on Genome Evolution of a Fungal Plant Pathogen. *Genetics* **201**: 1213–1228.
- 799 Croll D, Zala M, McDonald BA. 2013. Breakage-fusion-bridge cycles and large insertions  
800 contribute to the rapid evolution of accessory chromosomes in a fungal pathogen. *PLoS*  
801 *Genet* **9**: e1003567.
- 802 de Castro E, Soriano I, Marín L, Serrano R, Quintales L, Antequera F. 2011. Nucleosomal  
803 organization of replication origins and meiotic recombination hotspots in fission yeast.  
804 *EMBO J* **31**: 124 LP-137.
- 805 Duret L, Arndt PF. 2008. The impact of recombination on nucleotide substitutions in the  
806 human genome. *PLoS Genet* **4**.
- 807 Duret L, Galtier N. 2009. Biased Gene Conversion and the Evolution of Mammalian Genomic  
808 Landscapes. *Annu Rev Genomics Hum Genet* **10**: 285–311.
- 809 Dutheil J, Boussau B. 2008. Non-homogeneous models of sequence evolution in the Bio++  
810 suite of libraries and programs. *BMC Evol Biol* **8**: 1.
- 811 Dutheil JY, Gaillard S, Stukenbrock EH. 2014. MafFilter: a highly flexible and extensible  
812 multiple genome alignment files processor. *BMC Genomics* **15**: 53.
- 813 Goodwin SB, Ben M'Barek S, Dhillon B, Wittenberg AHJ, Crane CF, Hane JK, Foster AJ, Van der  
814 Lee TAJ, Grimwood J, Aerts A, et al. 2011a. Finished Genome of the Fungal Wheat  
815 Pathogen *Mycosphaerella graminicola* Reveals Dispensome Structure, Chromosome  
816 Plasticity, and Stealth Pathogenesis. *PLoS Genet* **7**: e1002070.

- 817 Goodwin SB, M'barek S Ben, Dhillon B, Wittenberg AHJ, Crane CF, Hane JK, Foster AJ, Van der  
818 Lee T a J, Grimwood J, Aerts A, et al. 2011b. Finished genome of the fungal wheat  
819 pathogen *Mycosphaerella graminicola* reveals dispensome structure, chromosome  
820 plasticity, and stealth pathogenesis. *PLoS Genet* **7**: e1002070.
- 821 Grandaubert J, Bhattacharyya A, Stukenbrock EH. 2015. RNA-seq Based Gene Annotation and  
822 Comparative Genomics of Four Fungal Grass Pathogens in the Genus *Zygomycetes*  
823 Identify Novel Orphan Genes and Species-Specific Invasions of Transposable Elements.  
824 *G3 Genes|Genomes|Genetics* **5.7**: 1323-1333
- 825 Gremme G, Steinbiss S, Kurtz S. 2013. GenomeTools: A Comprehensive Software Library for  
826 Efficient Processing of Structured Genome Annotations. *IEEE/ACM Trans Comput Biol*  
827 *Bioinforma* **10**: 645–656.
- 828 Hasegawa M, Kishino H, Yano T. 1985. Dating of the human-ape splitting by a molecular clock  
829 of mitochondrial DNA. *J Mol Evol* **22**: 160–174.
- 830 Hickman MA, Paulson C, Dudley AM, Berman J. 2015. Parasexual Ploidy Reduction Drives  
831 Population Heterogeneity Through Random and Transient Aneuploidy. *Genet* .
- 832 Hickman MA, Zeng G, Forche A, Hiraoka MP, Abbey D, Harrison BD, Wang Y-M, Su C,  
833 Bennett RJ, Wang Y, et al. 2013. The 'obligate diploid' *Candida albicans* forms mating-  
834 competent haploids. *Nature* **494**: 55–59.
- 835 Hobolth A, Dutheil JY, Hawks J, Schierup MH, Mailund T. 2011. Incomplete lineage sorting  
836 patterns among human, chimpanzee, and orangutan suggest recent orangutan  
837 speciation and widespread selection. *Genome Res* **21**: 349–356.
- 838 Hood ME, Petit E, Giraud T. 2013. Extensive divergence between mating-type chromosomes  
839 of the anther-smut fungus. *Genetics* **193**.
- 840 Horton MW, Hancock AM, Huang YS, Toomajian C, Atwell S, Auton A, Mulyati NW, Platt A,  
841 Sperone FG, Vilhjalmsson BJ, et al. 2012. Genome-wide patterns of genetic variation in  
842 worldwide *Arabidopsis thaliana* accessions from the RegMap panel. *Nat Genet* **44**: 212–  
843 216.
- 844 Hunter CM, Huang W, Mackay TFC, Singh ND. 2016. The Genetic Architecture of Natural  
845 Variation in Recombination Rate in *Drosophila melanogaster*. *PLoS*  
846 *Genet* **12**: e1005951.
- 847 Jeffreys AJ, Murray J, Neumann R. 1998. High-Resolution Mapping of Crossovers in Human  
848 Sperm Defines a Minisatellite-Associated Recombination Hotspot. *Mol Cell* **2**: 267–273.
- 849 Jeffreys AJ, Neumann R. 2009. The rise and fall of a human recombination hot spot. *Nat*  
850 *Genet* **41**: 625–629.

- 851 Jensen-Seaman MI, Furey TS, Payseur BA, Lu Y, Roskin KM, Chen C-F, Thomas MA, Haussler D,  
852 Jacob HJ. 2004. Comparative recombination rates in the rat, mouse, and human  
853 genomes. *Genome Res* **14**: 528–538.
- 854 Jones JD, Dangel JL. 2006. The plant immune system. *Nature* **444**: 323-329
- 855 Jones PA. 2012. Functions of DNA methylation: islands, start sites, gene bodies and beyond.  
856 *Nat Rev Genet* **13**: 484–492.
- 857 Kaplan N, Moore IK, Fondufe-Mittendorf Y, Gossett AJ, Tillo D, Field Y, LeProust EM, Hughes  
858 TR, Lieb JD, Widom J, et al. 2009. The DNA-encoded nucleosome organization of a  
859 eukaryotic genome. *Nature* **458**: 362–366.
- 860 Katoh K, Asimenos G, Toh H. 2009. Multiple alignment of DNA sequences with MAFFT.  
861 *Bioinforma DNA Seq Anal* 39–64.
- 862 Kellner R, Bhattacharyya A, Poppe S, Hsu TY, Brem RB, Stukenbrock EH. 2014. Expression  
863 Profiling of the Wheat Pathogen *Zymoseptoria tritici* Reveals Genomic Patterns of  
864 Transcription and Host-Specific Regulatory Programs. *Genome Biol Evol* **6**: 1353–1365.
- 865 Kong A, Gudbjartsson DF, Sainz J, Jonsdottir GM, Gudjonsson SA, Richardsson B,  
866 Sigurdardottir S, Barnard J, Hallbeck B, Masson G. 2002. A high-resolution  
867 recombination map of the human genome. *Nat Genet* **31**: 241–247.
- 868 Lam I, Keeney S. 2015. Nonparadoxical evolutionary stability of the recombination initiation  
869 landscape in yeast. *Science (80- )* **350**: 932–937.
- 870 Lassalle F, Périan S, Bataillon T, Nesme X, Duret L, Daubin V. 2015. GC-Content Evolution in  
871 Bacterial Genomes: The Biased Gene Conversion Hypothesis Expands. *PLoS Genet* **11**:  
872 e1004941.
- 873 Lo Presti L, Lanver D, Schweizer G, Tanaka S, Liang L, Tollot M, Zuccaro A, Reissmann S,  
874 Kahmann R. 2015. Fungal effectors and plant susceptibility. *Annu Rev Plant Biol* **66**:  
875 513–545.
- 876 Ma L-J, van der Does HC, Borkovich KA, Coleman JJ, Daboussi M-JM-J, Di Pietro A, Dufresne  
877 M, Freitag M, Grabherr M, Henrissat B, et al. 2010. Comparative genomics reveals  
878 mobile pathogenicity chromosomes in *Fusarium*. *Nature* **464**: 367–373.
- 879 Mancera E, Bourgon R, Brozzi A, Huber W, Steinmetz LM. 2008. High-resolution mapping of  
880 meiotic crossovers and non-crossovers in yeast. *Nature* **454**:479-485
- 881 Marais G, Mouchiroud D, Duret L. 2003. Neutral effect of recombination on base composition  
882 in *Drosophila*. *Genet Res (Camb)* **81**: 79–87.
- 883 McMullen MD, Kresovich S, Villeda HS, Bradbury P, Li H, Sun Q, Flint-Garcia S, Thornsberry J,  
884 Acharya C, Bottoms C, et al. 2009. Genetic Properties of the Maize Nested Association

- 885 Mapping Population. *Science (80- )* **325**: 737 LP-740.
- 886 Meunier J, Duret L. 2004. Recombination Drives the Evolution of GC-Content in the Human  
887 Genome. *Mol Biol Evol* **21**: 984–990.
- 888 Mugal CF, Weber CC, Ellegren H. 2015. GC-biased gene conversion links the recombination  
889 landscape and demography to genomic base composition. *BioEssays* **37**: 1317–1326.
- 890 Munch K, Mailund T, Dutheil JY, Schierup MH. 2014. A fine-scale recombination map of the  
891 human–chimpanzee ancestor reveals faster change in humans than in chimpanzees and  
892 a strong impact of GC-biased gene conversion. *Genome Res* **24**: 467–474.
- 893 Myers S, Bottolo L, Freeman C, McVean G, Donnelly P. 2005. A Fine-Scale Map of  
894 Recombination Rates and Hotspots Across the Human Genome. *Science (80- )* **310**:  
895 321–324.
- 896 Myers S, Bowden R, Tumian A, Bontrop RE, Freeman C, MacFie TS, McVean G, Donnelly P.  
897 2010. Drive Against Hotspot Motifs in Primates Implicates the PRDM9 Gene in Meiotic  
898 Recombination. *Science (80- )* **327**: 876–879.
- 899 Nordborg M, Charlesworth B, Charlesworth D. 1996. The effect of recombination on  
900 background selection. *Genet Res (Camb)* **67**: 159–174.
- 901 Petersen TN, Brunak S, Heijne G, Nielsen H. 2011. SignalP 4.0: discriminating signal peptides  
902 from transmembrane regions. *Nat Methods* **8**.
- 903 Petes TD. 2001. Meiotic recombination hot spots and cold spots. *Nat Rev Genet* **2**: 360–369.
- 904 Petit E, Giraud T, Vienne DM, Coelho MA, Aguilera G, Amselem J, Kreplak J, Poulain J, Gavory  
905 F, Wincker P, et al. 2012. Linkage to the mating-type locus across the genus  
906 *Microbotryum*: insights into nonrecombining chromosomes. *Evol Int J Org Evol* **66**.
- 907 Piganeau G, Mouchiroud D, Duret L, Gautier C. 2002. Expected relationship between the  
908 silent substitution rate and the GC content: implications for the evolution of isochores.  
909 *J Mol Evol* **54**.
- 910 R Core Team. 2013. R: A language and environment for statistical computing.
- 911 Rizzon C, Marais G, Gouy M, Biémont C. 2002. Recombination Rate and the Distribution of  
912 Transposable Elements in the *Drosophila melanogaster* Genome. *Genome Res* **12**: 400–  
913 407.
- 914 Scally A, Dutheil JY, Hillier LW, Jordan GE, Goodhead I, Herrero J, Hobolth A, Lappalainen T,  
915 Mailund T, Marques-Bonet T. 2012. Insights into hominid evolution from the gorilla  
916 genome sequence. *Nature* **483**: 169–175.
- 917 Schotanus K, Soyer JL, Connolly LR, Grandaubert J, Happel P, Smith KM, Freitag M,  
918 Stukenbrock EH. 2015. Histone modifications rather than the novel regional

- 919 centromeres of *Zymoseptoria tritici* distinguish core and accessory chromosomes.  
920 *Epigenetics Chromatin* **8**: 41.
- 921 Serres-Giardi L, Belkhir K, David J, Glémin S. 2012. Patterns and Evolution of Nucleotide  
922 Landscapes in Seed Plants. *Plant Cell* **24**: 1379–1397.
- 923 Singhal S, Leffler EM, Sannareddy K, Turner I, Venn O, Hooper DM, Strand AI, Li Q, Raney B,  
924 Balakrishnan CN, et al. 2015. Stable recombination hotspots in birds. *Science* (80- ) **350**:  
925 928–932.
- 926 Smeds L, Mugal CF, Qvarnström A, Ellegren H. 2016. High-Resolution Mapping of Crossover  
927 and Non-crossover Recombination Events by Whole-Genome Re-sequencing of an  
928 Avian Pedigree. *PLoS Genet* **12**: e1006044.
- 929 Smith KM, Phatale PA, Sullivan CM, Pomraning KR, Freitag M. 2011. Heterochromatin is  
930 required for normal distribution of *Neurospora crassa* CenH3. *Mol Cell Biol* **31**: 2528–  
931 2542.
- 932 Spencer CCA, Deloukas P, Hunt S, Mullikin J, Myers S, Silverman B, Donnelly P, Bentley D,  
933 McVean G. 2006. The influence of recombination on human genetic diversity. *PLoS*  
934 *Genet* **2**: e148.
- 935 Sperschneider J, Gardiner DM, Dodds PN, Tini F, Covarelli L, Singh KB, Manners JM, Taylor JM.  
936 2016. EffectorP: predicting fungal effector proteins from secretomes using machine  
937 learning. *New Phytol* **210**: 743–761. <http://dx.doi.org/10.1111/nph.13794>.
- 938 Staab PR, Zhu S, Metzler D, Lunter G. 2015. Scrm: efficiently simulating long sequences using  
939 the approximated coalescent with recombination. *Bioinformatics* **31**: 1680–1682.
- 940 Stukenbrock EH, Banke S, Javan-Nikkhah M, McDonald BA. 2007. Origin and domestication of  
941 the fungal wheat pathogen *Mycosphaerella graminicola* via sympatric speciation. *Mol*  
942 *Biol Evol* **24**: 398–411.
- 943 Stukenbrock EH, Bataillon T, Dutheil JY, Hansen TT, Li R, Zala M, McDonald BA, Wang J,  
944 Schierup MH. 2011. The making of a new pathogen: Insights from comparative  
945 population genomics of the domesticated wheat pathogen *Mycosphaerella graminicola*  
946 and its wild sister species. *Genome Res* **21**: 2157–2166.
- 947 Stukenbrock EH, Jørgensen FG, Zala M, Hansen TT, McDonald BA, Schierup MH. 2010. Whole-  
948 genome and chromosome evolution associated with host adaptation and speciation of  
949 the wheat pathogen *mycosphaerella graminicola*. *PLoS Genet* **6**: 1–13.
- 950 Stukenbrock EH, McDonald BA. 2009. Population genetics of fungal and oomycete effectors  
951 involved in gene-for-gene interactions. *Mol Plant Microbe Interact* **22**: 371–380.
- 952 Stukenbrock EH, Quaedvlieg W, Javan-Nikkhah M, Zala M, Crous PW, McDonald BA. 2012.

- 953 Zymoseptoria ardabiliae and Z. pseudotritici, two progenitor species of the septoria  
954 tritici leaf blotch fungus Z. tritici (synonym: Mycosphaerella graminicola). *Mycologia*  
955 **104**: 1397–407.
- 956 Stumpf MPH, McVean GAT. 2003. Estimating recombination rates from population-genetic  
957 data. *Nat Rev Genet* **4**: 959–968.
- 958 Taylor JW, Hann-Soden C, Branco S, Sylvain I, Ellison CE. 2015. Clonal reproduction in fungi.  
959 *Proc Natl Acad Sci* **112**: 8901–8908.
- 960 True JR, Mercer JM, Laurie CC. 1996. Differences in Crossover Frequency and Distribution  
961 Among Three Sibling Species of Drosophila. *Genetics* **142**: 507–523.  
962 <http://www.genetics.org/content/142/2/507.abstract>.
- 963 Tsai IJ, Burt A, Koufopanou V. 2010. Conservation of recombination hotspots in yeast. *Proc*  
964 *Natl Acad Sci* **107**: 7847–7852. <http://www.pnas.org/content/107/17/7847.abstract>.
- 965 Wallberg A, Glémin S, Webster MT. 2015. Extreme Recombination Frequencies Shape  
966 Genome Variation and Evolution in the Honeybee, *Apis mellifera*. *PLoS*  
967 *Genet* **11**: e1005189.
- 968 Wang Y, Rannala B. 2014. Bayesian Inference of Shared Recombination Hotspots Between  
969 Humans and Chimpanzees. *Genetics* **198**: 1621–1628.
- 970 Weber CC, Boussau B, Romiguier J, Jarvis ED, Ellegren H. 2014. Evidence for GC-biased gene  
971 conversion as a driver of between-lineage differences in avian base composition.  
972 *Genome Biol* **15**: 1–16.
- 973 Whittle CA, Johannesson H. 2011. Evidence of the accumulation of allele-specific non-  
974 synonymous substitutions in the young region of recombination suppression within the  
975 mating-type chromosomes of Neurospora tetrasperma. *Heredity* **107**: 305-314
- 976 Whittle CA, Sun Y, Johannesson H. 2011. Degeneration in codon usage within the region of  
977 suppressed recombination in the mating-type chromosomes of Neurospora  
978 tetrasperma. *Eukaryot Cell* **10**: 594-603
- 979 Wijnker E, Velikkakam James G, Ding J, Becker F, Klasen JR, Rawat V, Rowan BA, de Jong DF,  
980 de Snoo CB, Zapata L, et al. 2013. The genomic landscape of meiotic crossovers and  
981 gene conversions in Arabidopsis thaliana ed. G. McVean. *Elife* **2**: e01426.
- 982 Winckler W, Myers SR, Richter DJ, Onofrio RC, McDonald GJ, Bontrop RE, McVean GAT,  
983 Gabriel SB, Reich D, Donnelly P, et al. 2005. Comparison of Fine-Scale Recombination  
984 Rates in Humans and Chimpanzees. *Science (80- )* **308**: 107–111.
- 985 A language and environment for statistical computing. <http://www.R-project.org>  
986 2004. Sequence and comparative analysis of the chicken genome provide unique

987 perspectives on vertebrate evolution. *Nature* **432**: 695–716.

988

989 **Tables**

990 **Table 1:** Summary of genome alignment processing and whole-genome SNP analyses for *Z.*  
 991 *tritici* and *Z. ardabiliae*.  
 992

|                                                                                                                      | <i>Z. tritici</i>             |                                   | <i>Z. ardabiliae</i>          |                                   |
|----------------------------------------------------------------------------------------------------------------------|-------------------------------|-----------------------------------|-------------------------------|-----------------------------------|
| Size of sequenced reference genome                                                                                   | 39,686,251 bp                 |                                   | 31,546,591 bp                 |                                   |
| Number of exonic sites in reference genome                                                                           | 17,296,247 bp (43.6%)         |                                   | 15,570,421 bp (49.4%)         |                                   |
| Number of haplotypes                                                                                                 | 13                            |                                   | 17                            |                                   |
| <b>Summary genome alignment</b>                                                                                      | <b>Total alignment length</b> | <b>Number of alignment blocks</b> | <b>Total alignment length</b> | <b>Number of alignment blocks</b> |
| MultiZ alignment                                                                                                     | 40.8 Mb                       | 21,500                            | 32.4 Mb                       | 22,296                            |
| Splitting in max 10 Kb                                                                                               | 40.8 Mb                       | 21,904                            | 32.4 Mb                       | 23,001                            |
| MAFFT Realignment                                                                                                    | 40.5 Mb                       | 21,904                            | 32.2 Mb                       | 23,001                            |
| Keep blocks with all strains                                                                                         | 27.7 Mb                       | 6,455                             | 28.2 Mb                       | 7,117                             |
| Filter 1                                                                                                             | 27.5 Mb                       | 15,703                            | 28.0 Mb                       | 18,402                            |
| Filter 2                                                                                                             | 27.3 Mb                       | 18,785                            | 27.7 Mb                       | 26,074                            |
| Percentage of repeated sequences in initial alignment                                                                | 19.74%                        |                                   | 3.36%                         |                                   |
| Percentage of repeated sequences in final alignment                                                                  | 0.93%                         |                                   | 1.38%                         |                                   |
| Total number of SNPs                                                                                                 | 1,483,950                     |                                   | 1,069,014                     |                                   |
| Total number of analyzed SNPs (biallelic, no unresolved state) and percent of total SNPs                             | 1,438,385 (96.9%)             |                                   | 1,035,158 (96.8%)             |                                   |
| Total number of SNPs in exons and percent of total SNPs                                                              | 713,733 (48.1%)               |                                   | 403,895 (37.8%)               |                                   |
| Total number of analyzed SNPs in exons (biallelic, no unresolved state), and percent of total analyzed SNPs in exons | 690,096 (96.7%)               |                                   | 396,247 (98.1%)               |                                   |
| <b>Summary SNP analyses</b>                                                                                          | <b>1 Mb windows</b>           | <b>100 kb Windows</b>             | <b>1 Mb windows</b>           | <b>100 kb windows</b>             |
| Min. number of SNPs                                                                                                  | 143                           | 0                                 | 0                             | 0                                 |
| Median number of SNPs                                                                                                | 43,680                        | 3,556                             | 1,598                         | 634                               |
| Max. number of SNPs                                                                                                  | 102,400                       | 15,170                            | 33,680                        | 20,110                            |
| Diversity (median of Watterson's theta in windows of 10 kb)                                                          | 0.0139                        |                                   | 0.008663                      |                                   |



994

995 **Table 2:** Recombination and repeat content in centromeres of *Z. tritici*.

|             | Chromosome | Start   | Stop    | Length | Mean rho | Nb. of SNPs in centromere | Mean rho for Full chromosome | Repeat density | TE density |
|-------------|------------|---------|---------|--------|----------|---------------------------|------------------------------|----------------|------------|
| Essential   | 1          | 3839299 | 3851749 | 12450  | 0.229    | 20                        | 0.021                        | 0.94%          | 31.33%     |
|             | 2          | 512901  | 521916  | 9015   | 0.053    | 77                        | 0.024                        | 0.00%          | 32.39%     |
|             | 3          | 3348307 | 3356535 | 8228   | 0.097    | 269                       | 0.025                        | 0.00%          | 0.00%      |
|             | 4          | 217113  | 226545  | 9432   | 0.033    | 421                       | 0.028                        | 0.00%          | 9.88%      |
|             | 5          | 2604117 | 2614736 | 10619  | 0.104    | 47                        | 0.027                        | 0.94%          | 28.19%     |
|             | 6          | 625186  | 637601  | 12415  | NA       | 0                         | 0.026                        | 3.10%          | 37.46%     |
|             | 7          | 255824  | 266207  | 10383  | 0.006    | 79                        | 0.044                        | 0.32%          | 0.00%      |
|             | 8          | 213892  | 227444  | 13552  | 0.059    | 62                        | 0.029                        | 0.45%          | 39.99%     |
|             | 9          | 2067589 | 2076063 | 8474   | 0.015    | 106                       | 0.040                        | 0.50%          | 0.00%      |
|             | 10         | 99716   | 109365  | 9649   | 0.016    | 77                        | 0.049                        | 0.00%          | 15.32%     |
|             | 11         | 365130  | 373557  | 8427   | NA       | 0                         | 0.049                        | 0.00%          | 46.30%     |
|             | 12         | 180233  | 188209  | 7976   | 0.001    | 150                       | 0.052                        | 2.48%          | 7.10%      |
|             | 13         | 236993  | 242558  | 5565   | 0.015    | 156                       | 0.037                        | 0.50%          | 0.00%      |
| Dispensable | 14         | 59960   | 70870   | 10910  | 0.000    | 785                       | 0.000                        | 0.00%          | 35.86%     |
|             | 15         | 382500  | 394754  | 12254  | 0.001    | 1098                      | 0.001                        | 0.86%          | 20.04%     |
|             | 16         | 332004  | 342592  | 10588  | 0.099    | 83                        | 0.023                        | 0.00%          | 35.97%     |
|             | 17         | 406958  | 418893  | 11935  | NA       | 0                         | 0.000                        | 0.24%          | 46.85%     |
|             | 18         | 159000  | 171999  | 12999  | NA       | 0                         | 0.159                        | 0.00%          | 46.62%     |
|             | 19         | 148227  | 159387  | 11160  | 0.001    | 4                         | 0.000                        | 0.76%          | 1.38%      |
|             | 20         | 94677   | 105169  | 10492  | NA       | 0                         | 0.008                        | 0.30%          | 11.86%     |
|             | 21         | 340264  | 346657  | 6393   | NA       | 0                         | NA                           | 0.31%          | 2.33%      |

997

## 998 **Figure legends**

999 **Figure 1: Correlations among recombination maps in *Z. tritici* show highly correlated**  
1000 **estimates from two composite likelihood methods.** A) Correlation circle of the six  
1001 population genomic recombination maps based on the two first principal components. The  
1002 programs Ldhat interval (Auton and McVean 2007) and Ldhelmet (Chan et al. 2012) were  
1003 both used with three distinct input scaled effective population sizes ( $\Theta$ ) of 0.0005, 0.005 and  
1004 0.05. B) Correlation of the Ldhat and Ldhelmet maps with  $\Theta = 0.005$ . The Ldhat map was  
1005 discretized into 10 categories with equal number of points. The points represent the mean  
1006 +/- the standard error for each category. C) To assess the quality of the inferred  
1007 recombination maps, genome-wide estimates of recombination were correlated with a  
1008 genetic map obtained by experimental crossing of *Z. tritici* isolates. Correlations between  
1009 population genomic maps (obtained by Ldhat and Ldhelmet) with a scaled population size of  
1010 0.005 and the average recombination map from two independent crosses (Croll et al. 2015).  
1011

1012 **Figure 2: effect of sample size and diversity on the estimation of recombination rate by**  
1013 **Ldhat.** 10 Mb regions (1Mb for regions with  $\theta = 0.05$ ) were simulated using a coalescent  
1014 model with variable recombination rate. Dots are average of point estimates of local  
1015 recombination rate inferred using Ldhat ("interval" program). Each dot corresponds to a  
1016 region with constant recombination rate in the simulated alignment. Bars indicate the 1<sup>st</sup> and  
1017 3<sup>rd</sup> quartiles of Ldhat estimates for the region. Grey points are raw estimates; black points are  
1018 computed from filtered estimates (see Methods). The red diagonal line shows the 1:1 ratio.  
1019 Columns indicate distinct population mutation rate ( $\theta = 4 N_e u$ ) and rows distinct sample  
1020 sizes (number of haploid genomes).  
1021

1022 **Figure 3: Variation in recombination rate across chromosomes.** Based on the population  
1023 genomics data of *Z. tritici* and *Z. ardabiliae*, genome-wide patterns of recombination are  
1024 estimated. Patterns of variation across chromosome 1 of *Z. tritici* is shown as example. A)  
1025 SNP density in 10 kb windows with corresponding smoothing curve. B) Distribution of called  
1026 sites along the chromosome in black, corresponding to the regions that were included in the  
1027 analyses. C) Estimates of the population recombination rate  $\rho$  show a highly heterogeneous  
1028 recombination landscape across the chromosomes. D) Observed GC content. The position of  
1029 the centromere of chromosome 1 is marked over the chromosome plots as a vertical stippled  
1030 line.  
1031

1032 **Figure 4: Broad-scale recombination rates in *Z. tritici* and *Z. ardabiliae*.** Broad-scaled  
1033 patterns of recombination rate in *Z. tritici* and *Z. ardabiliae* demonstrate a strong effect of  
1034 chromosome size and chromosome type. A) Mean recombination rate in *Z. tritici* and *Z.*  
1035 *ardabiliae* per essential chromosome as a function of the chromosome size. B) Mean  
1036 recombination rate per essential chromosome arm as a function of the arm size. C)  
1037 Distribution of mean recombination rate per chromosome in *Z. tritici* as a function of  
1038 chromosome type (essential or accessory).

1039

1040 **Figure 5: Fine-scale recombination patterns within chromosomes.** A) The distribution of  
1041 recombination rate estimates in different sequence features in *Z. tritici* and *Z. ardabiliae*  
1042 reveals small, but significant differences among the non-coding, coding and UTR sequences  
1043 in both species. Top line numbers indicate significance groups by decreasing value of  
1044 recombination rate. Categories with identical numbers are not significantly different at the  
1045 1% level. B) Distribution of recombination rate estimates in exons, introns and UTRs of  
1046 effector and non-effector genes is shown. Bow widths are proportional to the sample sizes.  
1047 For *Z. ardabiliae*, the recombination rate in exons and introns is significantly lower in effector  
1048 genes compared to non-effector genes (Wilcoxon rank test corrected for multiple testing, NS:  
1049 non significant, \*: 5% level, \*\*\*: below 0.1% level).

1050

1051 **Figure 6: Recombination maps of *Z. tritici* and *Z. ardabiliae* plotted along the chromosome**  
1052 **1 of *Z. tritici*.** A) Recombination map in 100 kb windows plotted together with smoothing  
1053 curves. B) Cumulative curves of the recombination maps, scaled in order to be comparable.  
1054 Figures for other chromosomes are available as Supplementary Data.

1055

1056 **Figure 7: Correlation of recombination maps of *Z. tritici* and *Z. ardabiliae*.** A) Comparison of  
1057 the two recombination maps based on average recombination rates in windows of at least  
1058 100 SNPs in each species. Points represent averages in 10 classes with equal number of  
1059 windows, error bars represent the mean +/- standard error. B) Correlation of recombination  
1060 maps in sliding windows of different sizes. Three distinct correlation coefficients are plotted  
1061 against recombination rates averaged in different window sizes (see Materials and Methods).  
1062 Points indicate the averages of 1,000 samples and bars shows the standard errors of the  
1063 means. Lines correspond to local regression smoothing (LOES).

1064

1065 **Figure 8: Distribution of hotspots in the genomes of *Z. tritici* and *Z. ardabiliae*.** A: example  
1066 mapped hotspot in a homologous region in *Z. tritici* and *Z. ardabiliae*. Lines indicate the  
1067 background recombination rate as estimated by Ldhat. Bars indicate the positions, width and  
1068 strength of hotspots detected by Ldhot in the region, after filtering (see Materials and  
1069 Methods). B: Number of hotspots in *Z. tritici* in the direct 1 kb range of a hotspot in *Z.*  
1070 *ardabiliae* (vertical line) and the corresponding distribution under the null hypothesis of a  
1071 random distribution of hotspots. C: Frequencies of hotspots in distinct regions of the  
1072 genome. Number of detected hotspots in each region as a function of the number of called  
1073 sites. Lines correspond to ordinary least square regressions.  
1074

## 1075 **Supplementary Material**

1076 **Table S1:** Summary information of *Z. tritici* and *Z. ardabiliae* isolates used in the study.  
1077

1078 **Figure S1: Genome-wide recombination rate and GC content.** A) Observed GC content in *Z.*  
1079 *tritici* plotted against observed GC content in *Z. ardabiliae*. B) Equilibrium GC content in *Z.*  
1080 *tritici* plotted against equilibrium GC content in *Z. ardabiliae*. C) GC content as a function of  
1081 recombination rate. Recombination rate was discretized in 10 categories with the same  
1082 amount of points. Points indicate the mean GC content in each category; and bars  
1083 correspond to standard errors of the means.  
1084

1085 **Supplementary Data 1:** Chromosomal patterns for every chromosomes. Legends as in Figure  
1086 3.  
1087

1088 **Supplementary Data 2:** Correlation of recombination maps for every chromosomes. Legends  
1089 as in Figure 6.  
1090

1091 **Supplementary Data 3:** All scripts and data allowing reproducing results and figures in this  
1092 manuscript (deposited on FigShare).

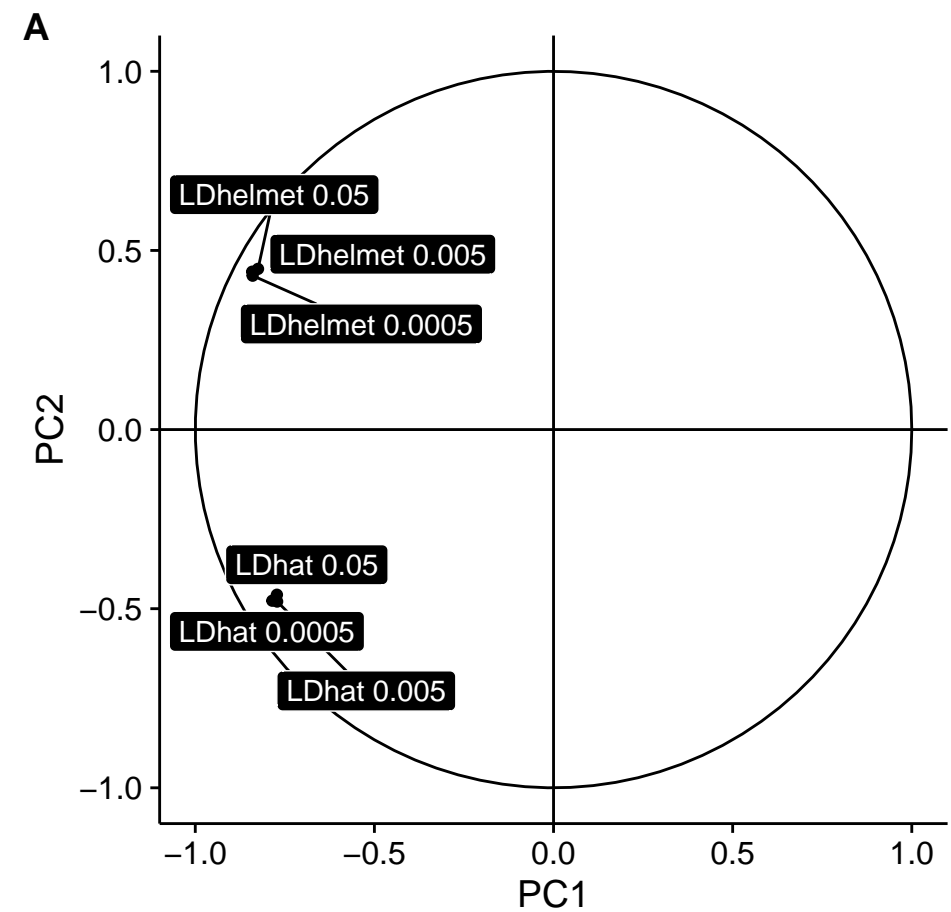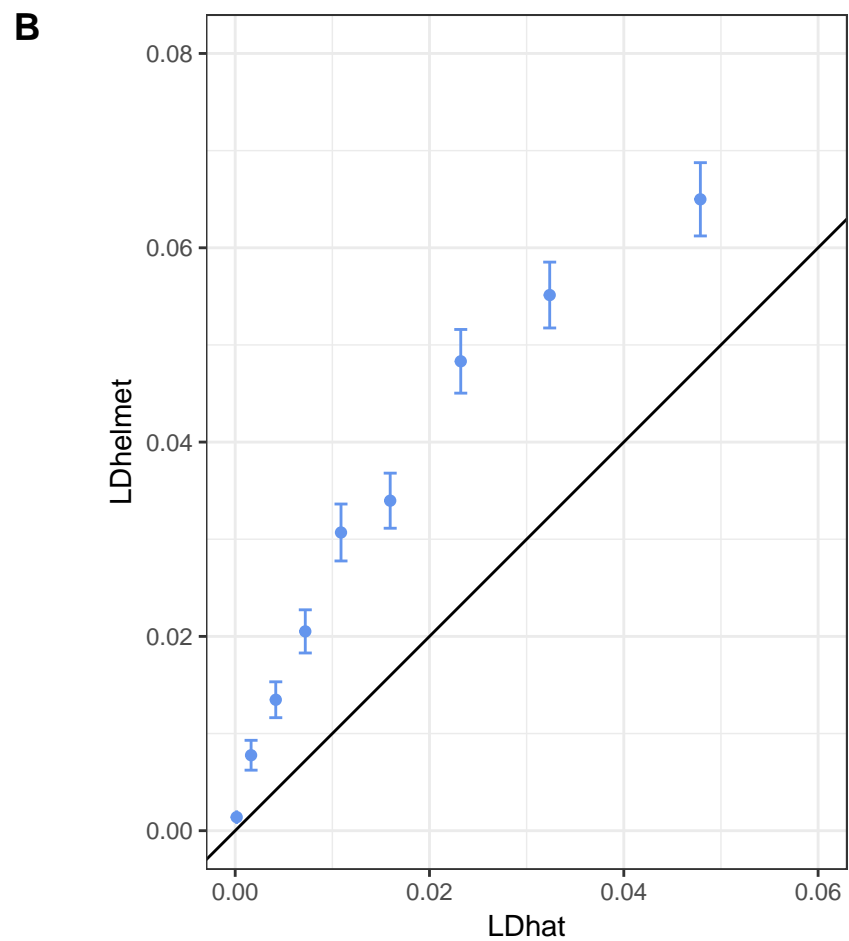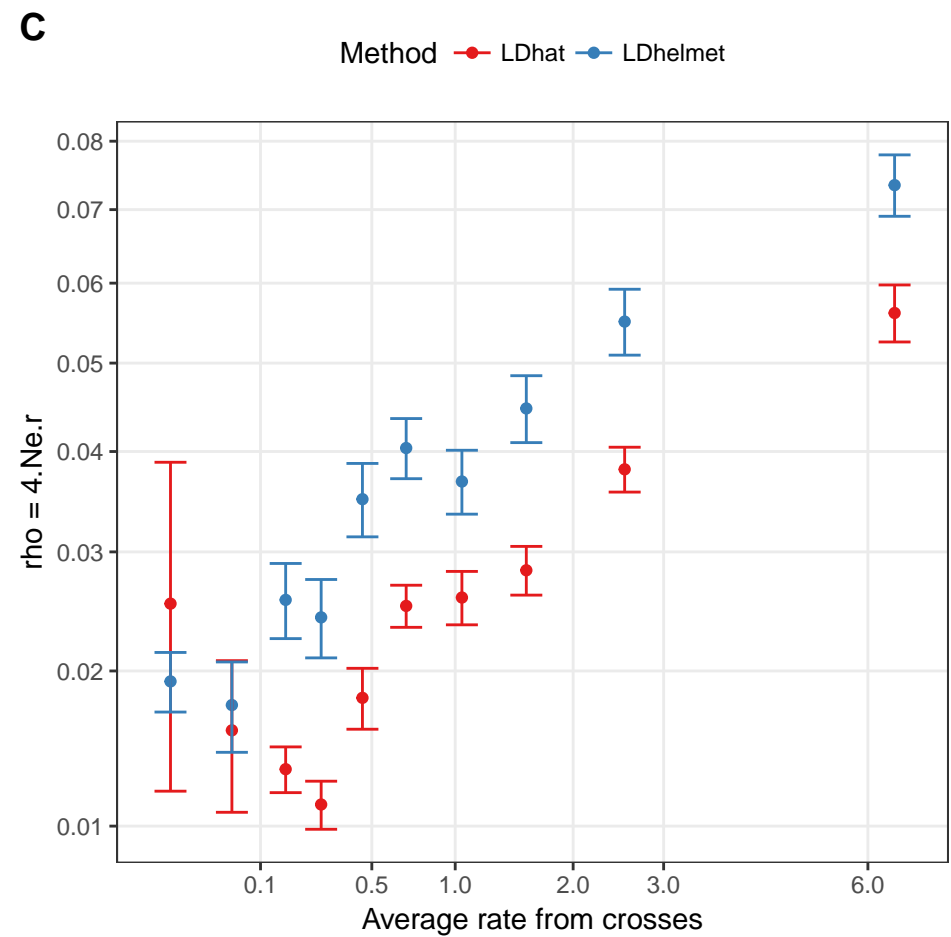

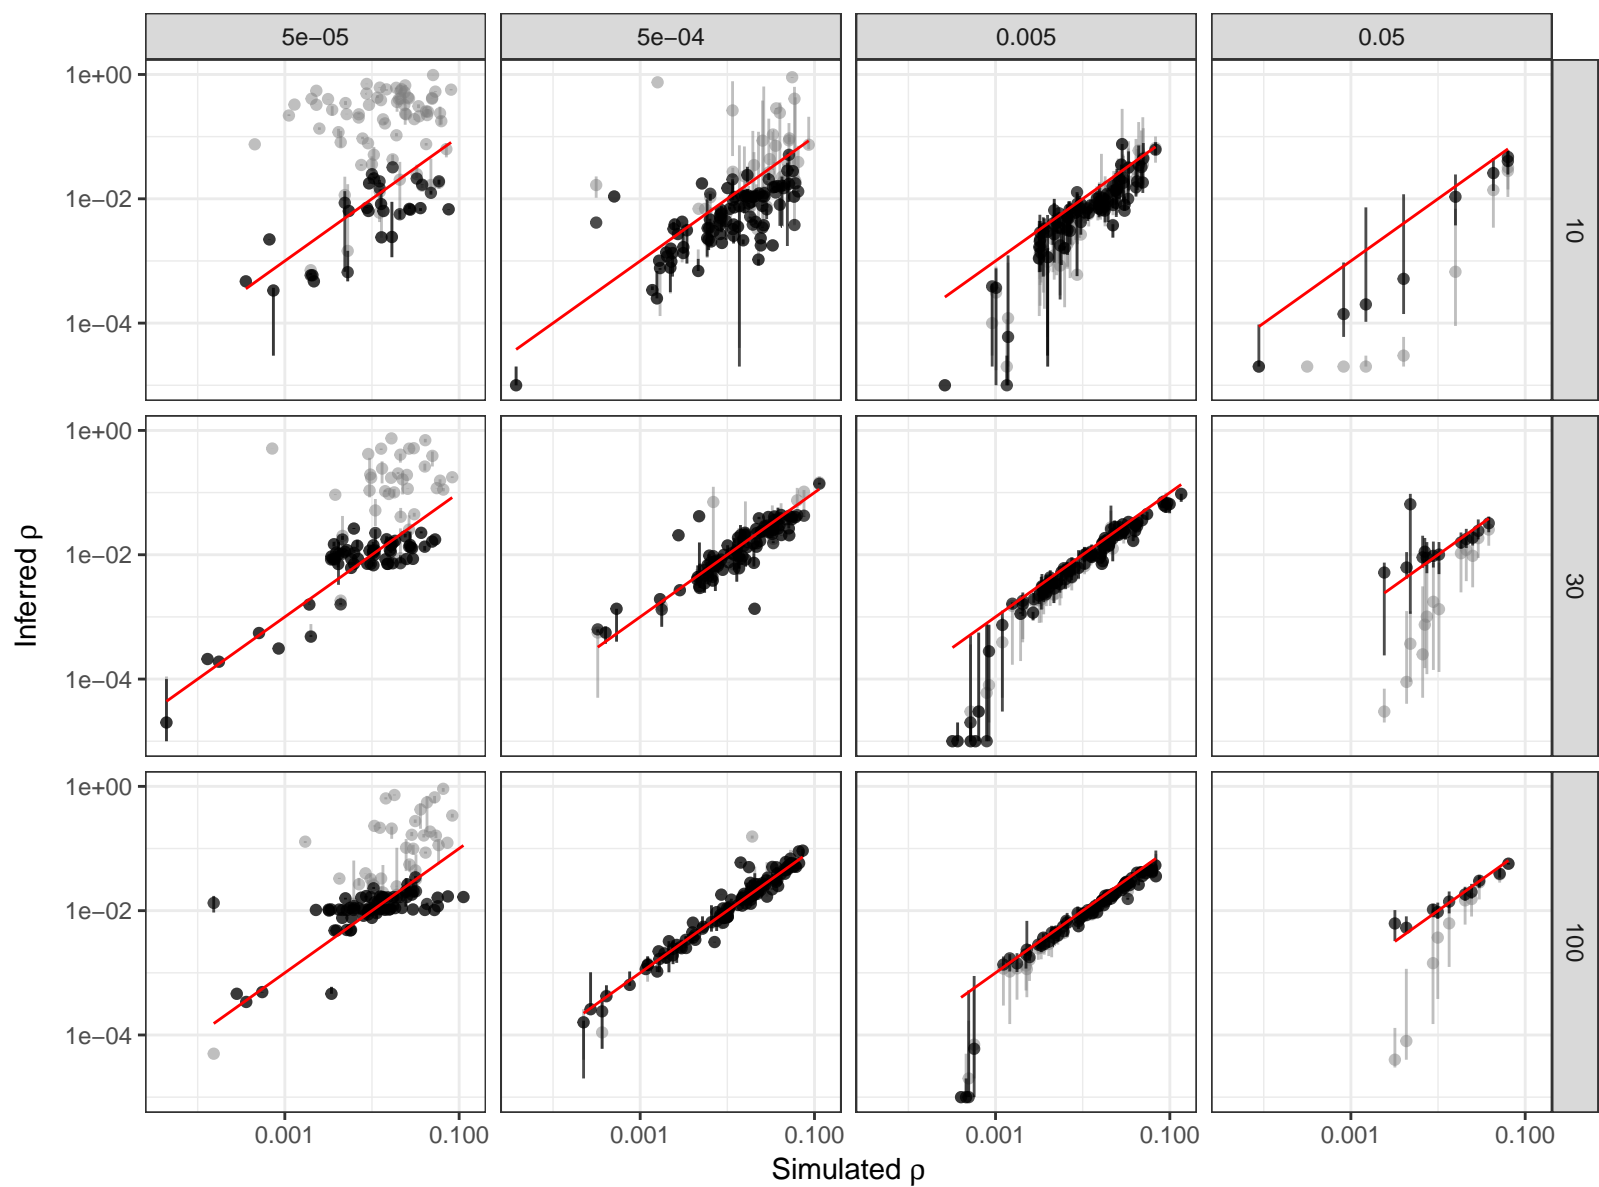

# Chromosome 1

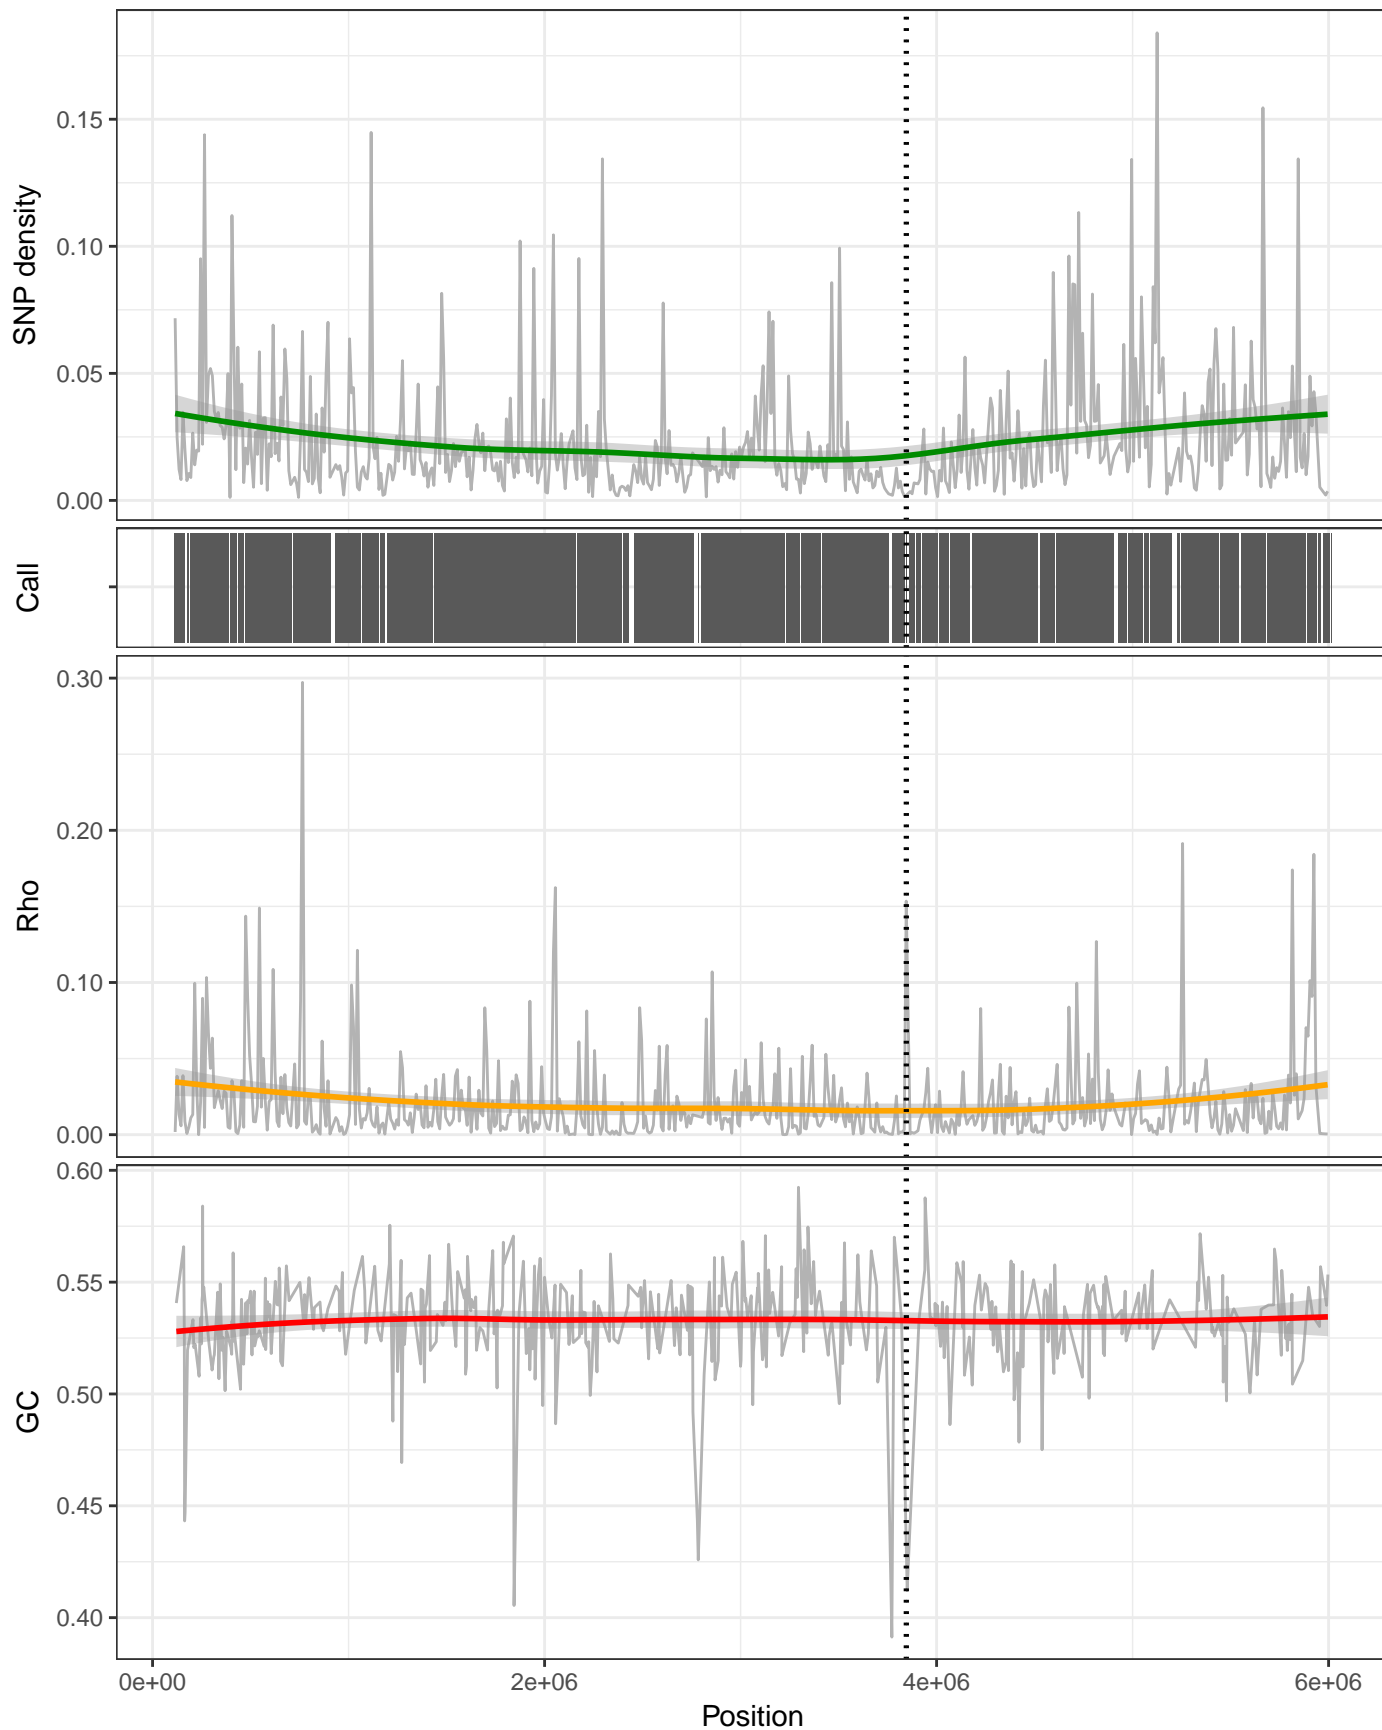

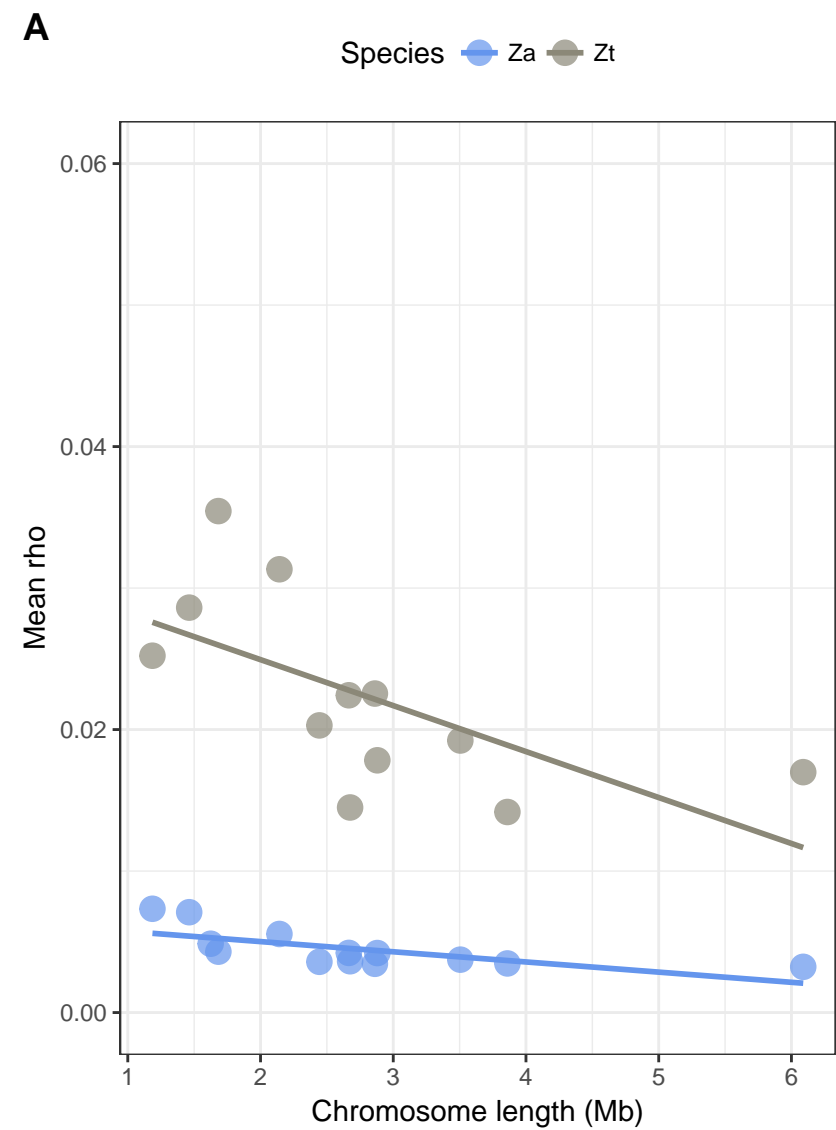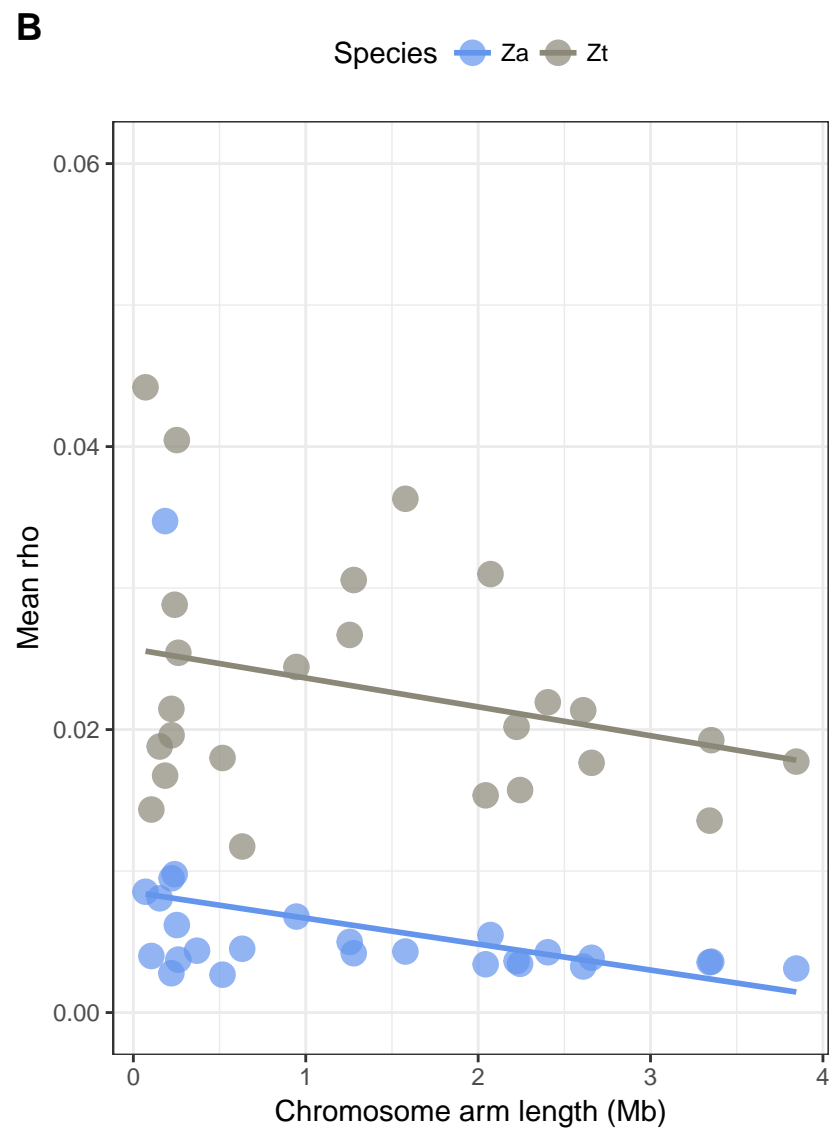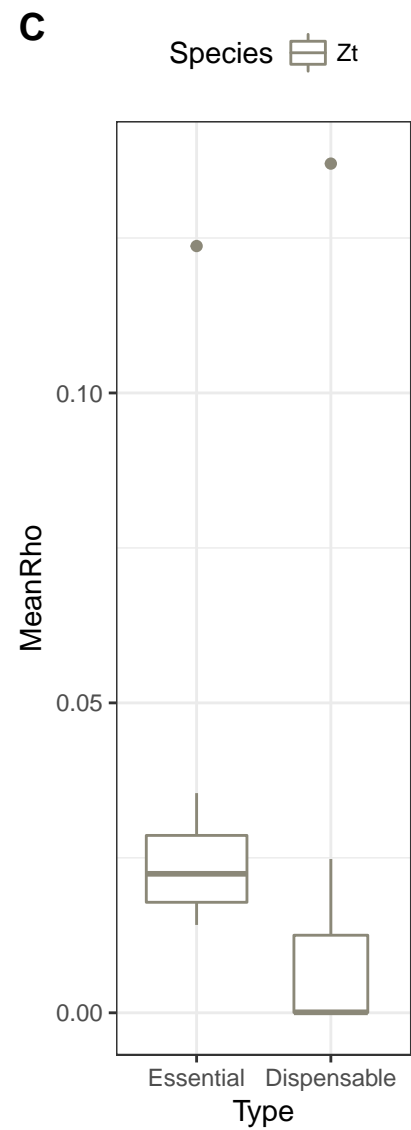



**A**Species ■ *Z. ardabiliae* ■ *Z. tritici*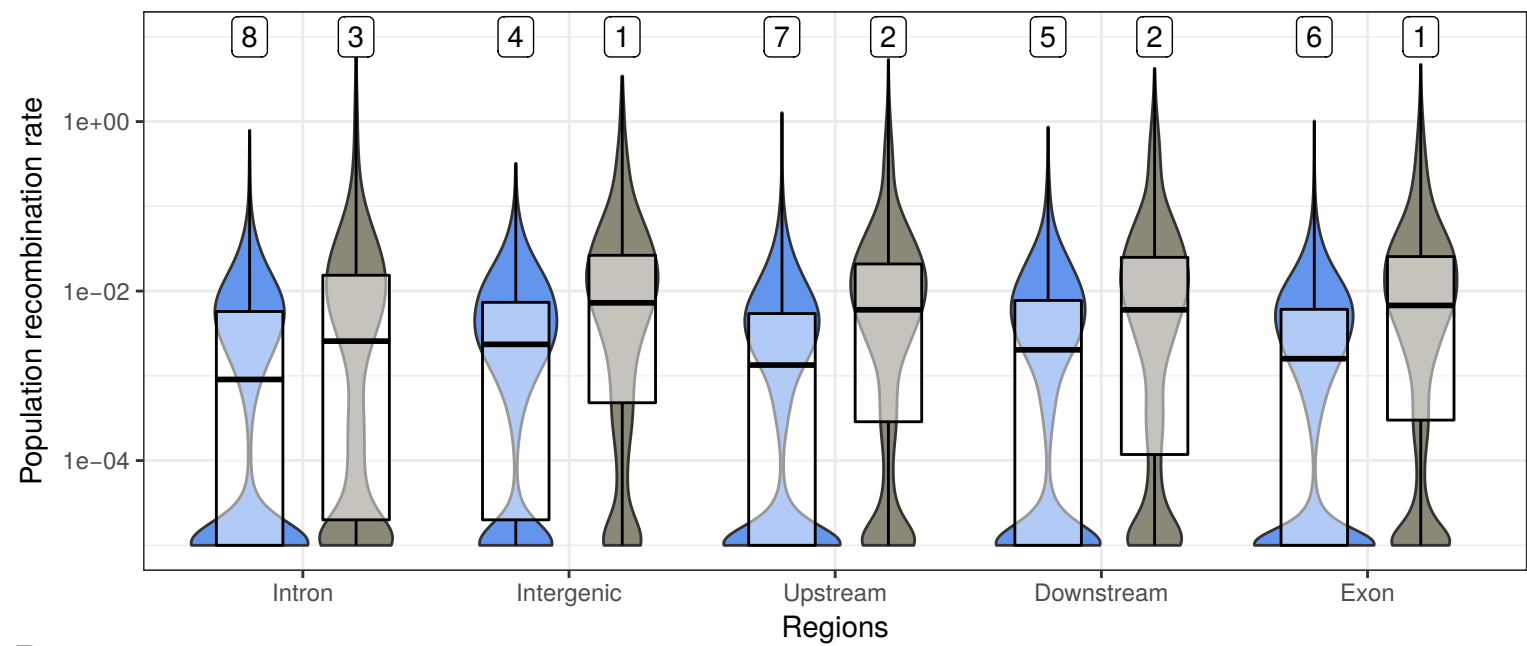**B**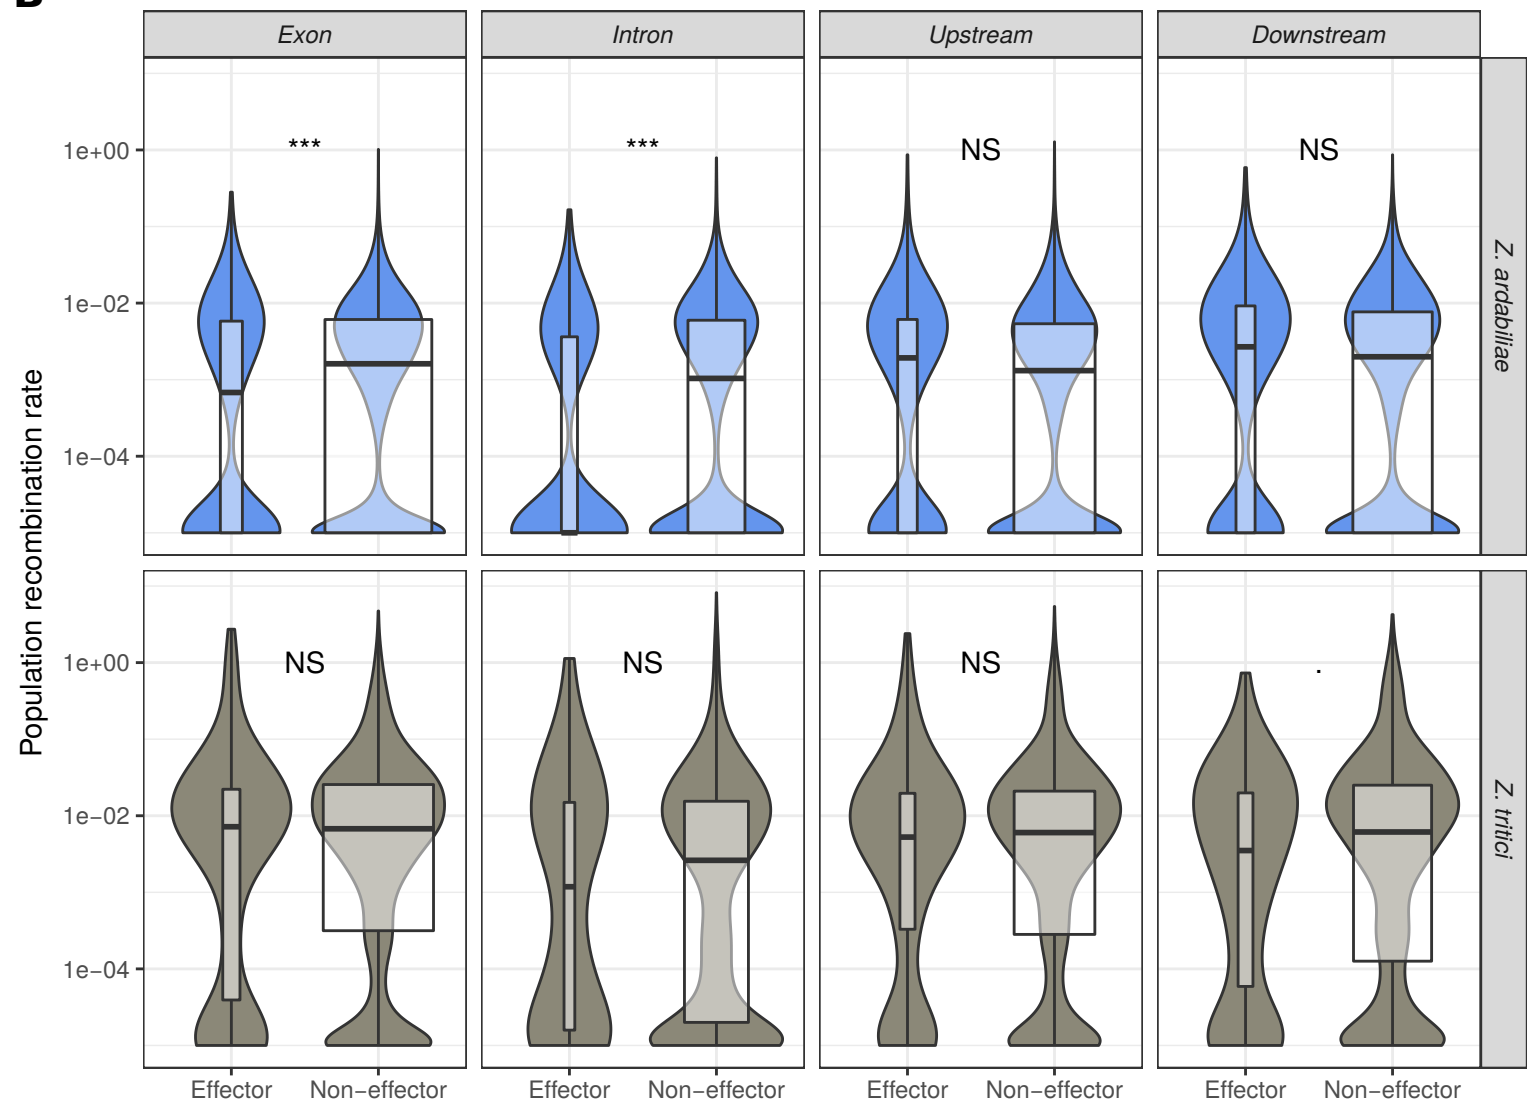

# Chromosome 1

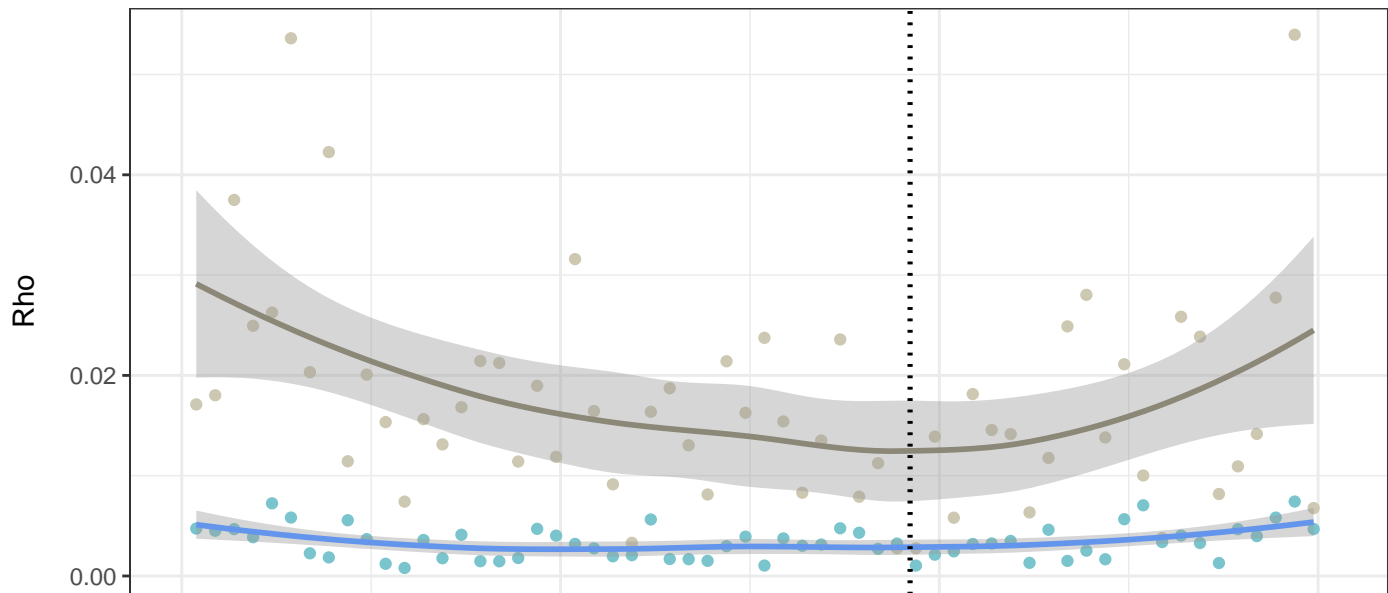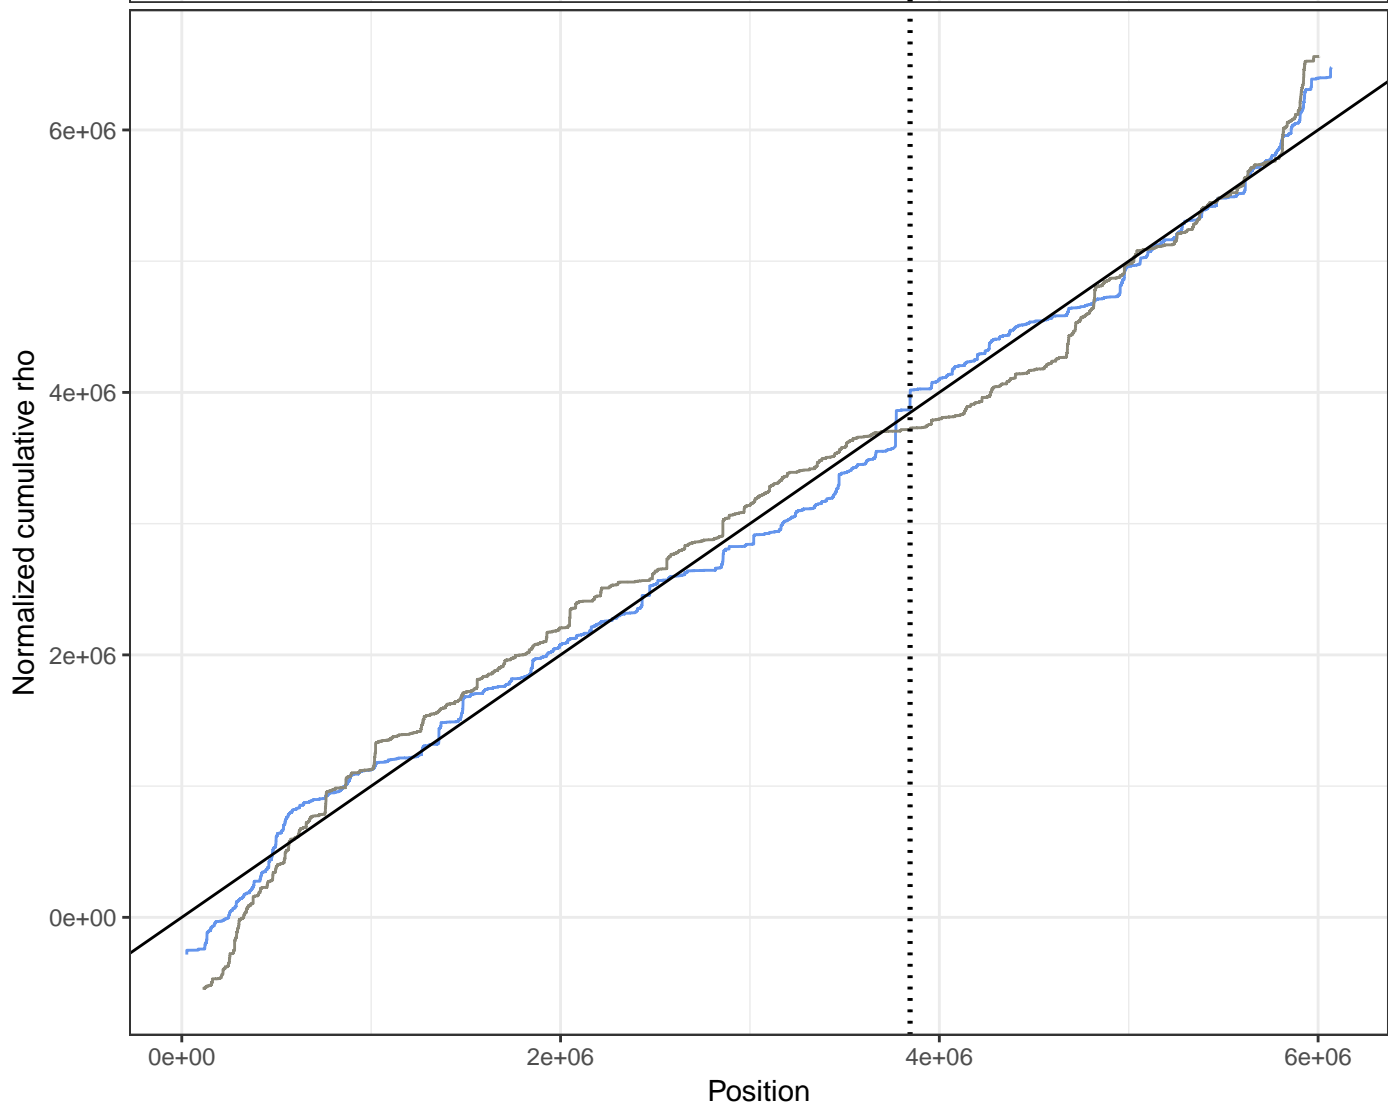

Species — *Z. ardabiliae* — *Z. tritici*

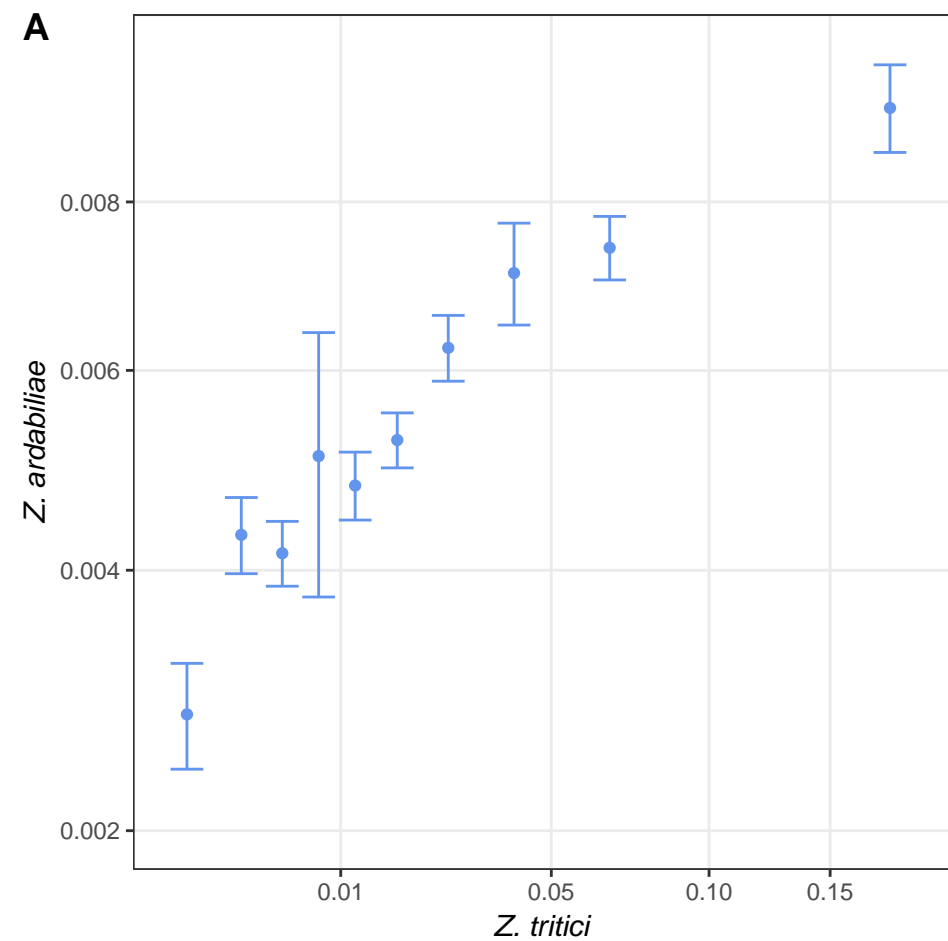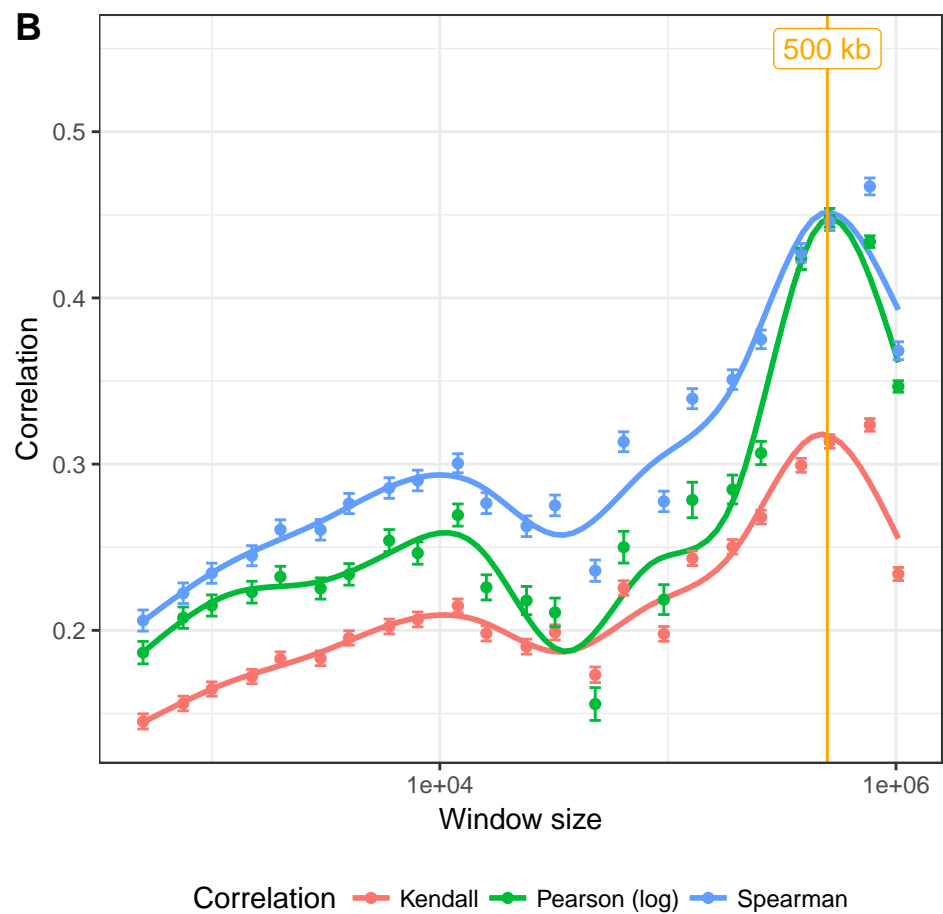

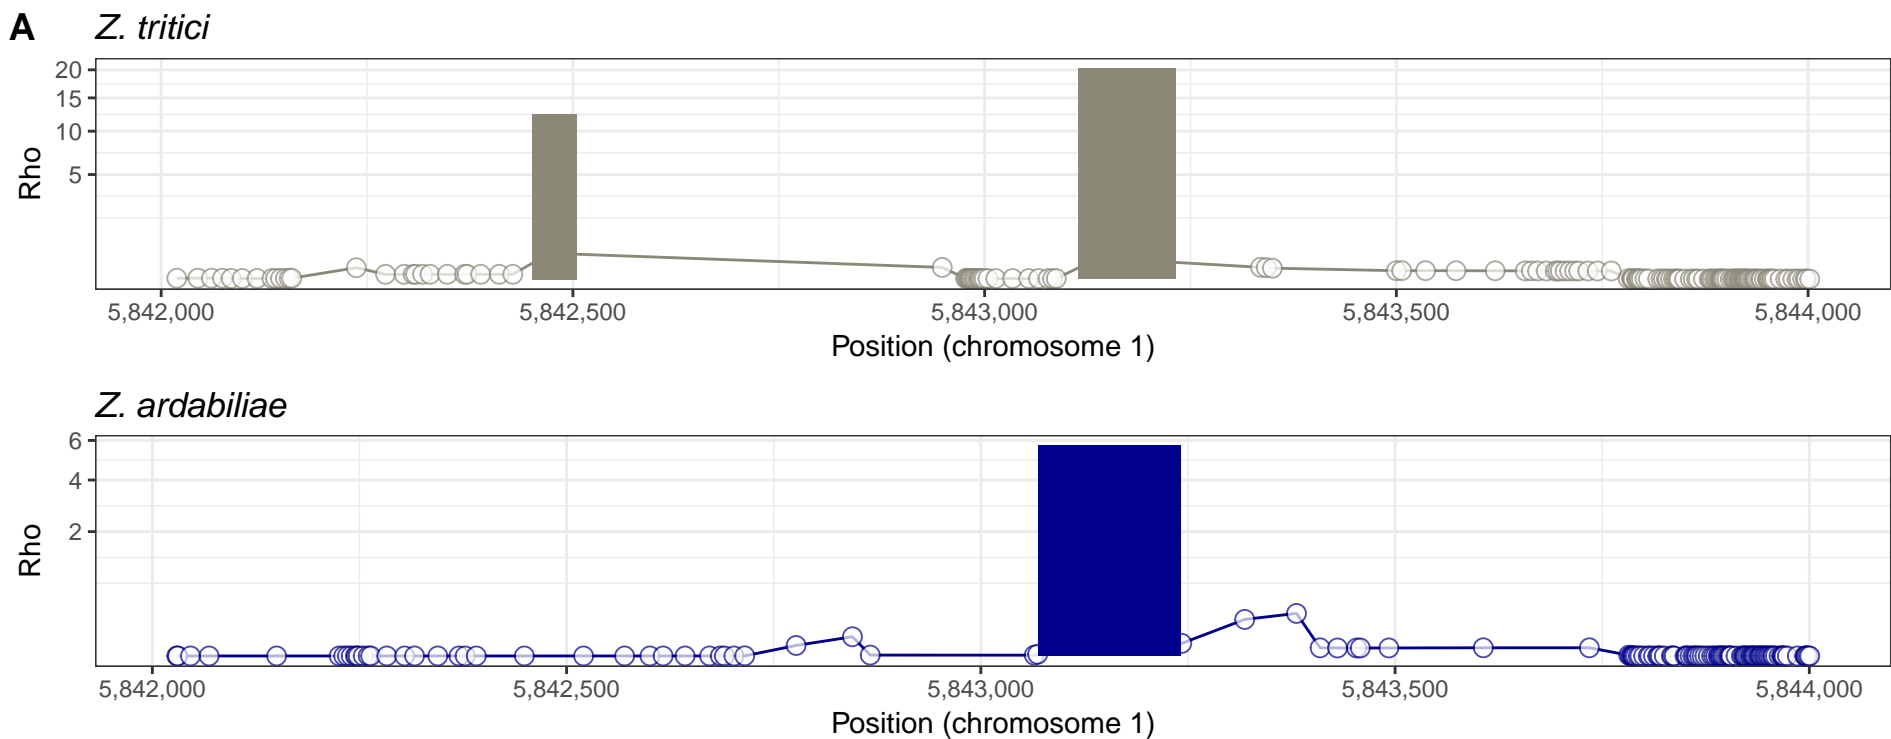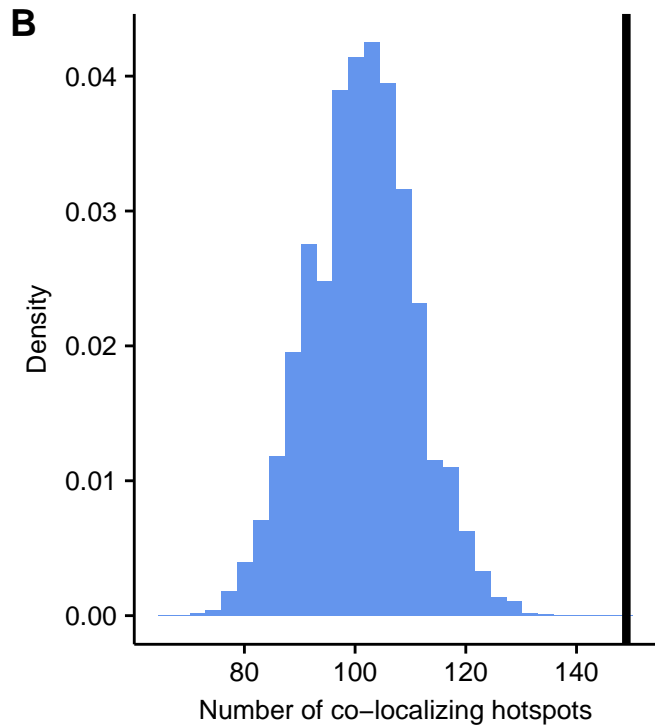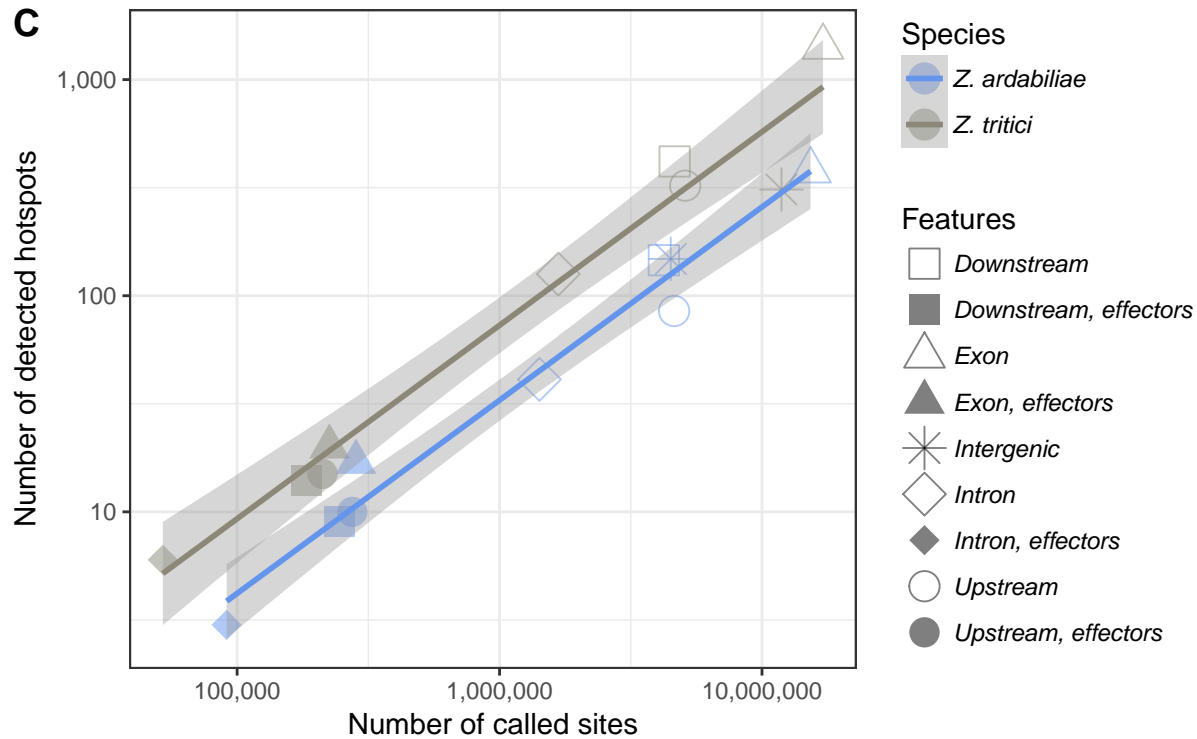

Source: https://www.biorxiv.org/content/10.1101/158907v1.full.pdf
